# Supplementary material for: Selective G-quadruplex stabilizers: Schiff-base metal complexes with anticancer activity
Source: Royal Society of Chemistry journal article supplement (doi:10.1039/c4ra05355a), 2014-01-01
Supplement: c4ra05355a1.pdf [file c4ra05355a1.pdf]

## Supplementary Information

# Selective G-Quadruplex Stabilizers: Schiff-base Metal Complexes with Anticancer Activity

Alessio Terenzi,<sup>a</sup> Riccardo Bonsignore,<sup>a</sup> Angelo Spinello,<sup>a</sup> Carla Gentile,<sup>a</sup> Annamaria Martorana,<sup>a</sup>

Cosimo Ducani,<sup>b</sup> Björn Högberg,<sup>b</sup> Anna Maria Almerico,<sup>a</sup> Antonino Lauria<sup>a</sup> and Giampaolo Barone<sup>\*a,c</sup>

<sup>a</sup> Dipartimento di Scienze e Tecnologie Biologiche, Chimiche e Farmaceutiche, Viale delle Scienze, Edificio 17, 90128 Palermo, Italy. Fax: +39 091 596825; E-mail: [giampaolo.barone@unipa.it](mailto:giampaolo.barone@unipa.it)

<sup>b</sup> Swedish Medical Nanoscience Center, Department of Neuroscience, Karolinska Institutet, Stockholm, Sweden;

<sup>c</sup> Istituto EuroMediterraneo di Scienza e Tecnologia, Via Emerico Amari 123, 90139 Palermo, Italy.

### Content

- **Figure S1.** Absorption spectra of **1** (a), **2** (b) and **3** (c) in presence of increasing amounts of ct-DNA in Tris-HCl buffer 50 mM and KCl 100 mM. (a) [**1**] = 13.1  $\mu\text{M}$ , (b) [**2**] = 30.9  $\mu\text{M}$ , (c) [**3**] = 23.6  $\mu\text{M}$ .
- **Figure S2.** Top panel: Example of MD simulation box, showing the **3**/*h-Telo* binding complex, the solution counterions, K<sup>+</sup> (in pink) and Cl<sup>-</sup> (in cyan), and the explicit water molecules (in red). Bottom panel: Plot of the RMSD obtained for **3**/*h-Telo* up to 50 ns of MD simulations.
- **Figure S3.** PCR inhibition of Pu22mu with compounds **1**, **2** and **3**.
- **Table S1.** DFT energies (in Hartree), *in vacuo* and in water solution, of **1**, **2** and **3**, of the high layers of their binding complexes with *h-Telo*, and thermal corrections of the enthalpy and of the Gibbs free energy obtained by DFT/MM calculations of the harmonic vibration frequencies.
- **Table S2.** Cartesian coordinates of the geometries of the intercalation complexes of **1**, **2** and **3** with *h-Telo*, fully optimized by DFT/MM calculations. Amber99 atom types, high and low layer labels are also shown.

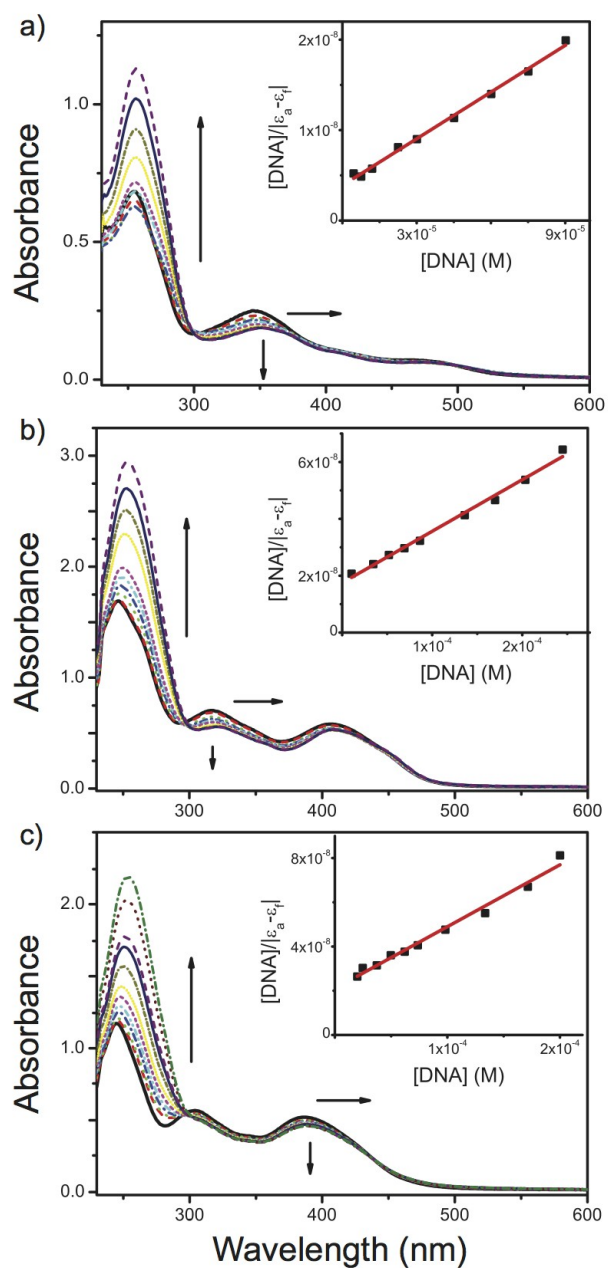

**Fig S1.** Absorption spectra of **1** (a), **2** (b) and **3** (c) in presence of increasing amounts of ct-DNA in Tris-HCl buffer 50 mM and KCl 100 mM. (a)  $[1] = 13.1 \mu\text{M}$ , (b)  $[2] = 30.9 \mu\text{M}$ , (c)  $[3] = 23.6 \mu\text{M}$ . Ratios  $R = [DNA]/[ML^{2+}]$  are in the range 0.00-6.8 for **1**, 0.00-8.5 for **2** and **3**. The arrows indicate the change upon ct-DNA addition.

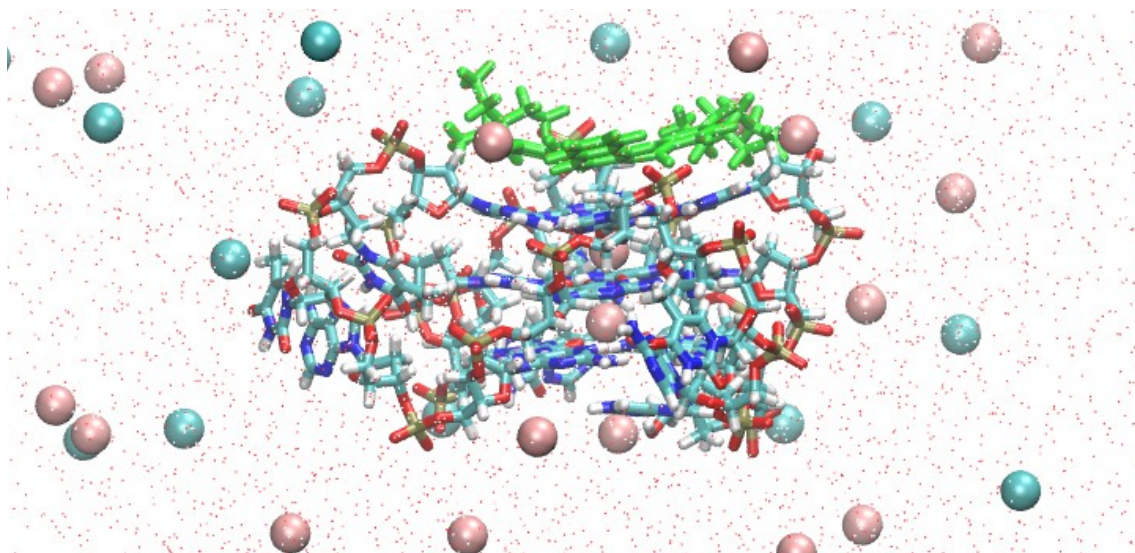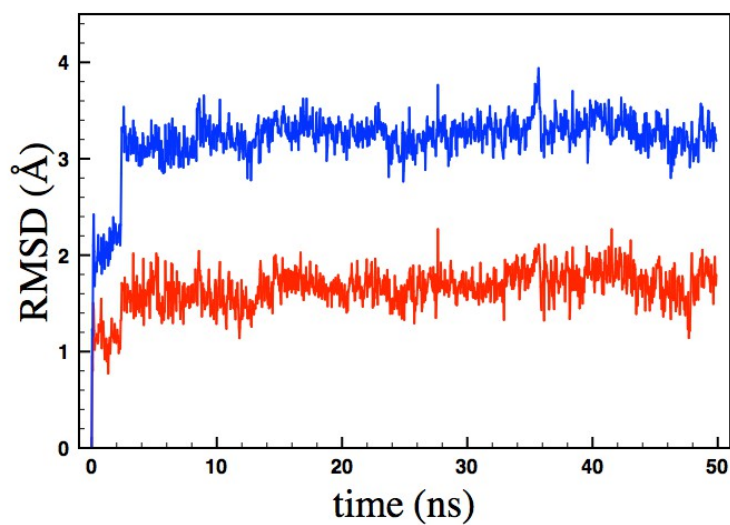

**Fig S2.** Top panel: Example of a MD simulation box, showing the **3/h-Telo** binding complex, the solution counterions,  $K^+$  (in pink) and  $Cl^-$  (in cyan), and the explicit water molecules (in red). Bottom panel: Plot of the RMSD obtained for **3/h-Telo** up to 50 ns of MD simulations.

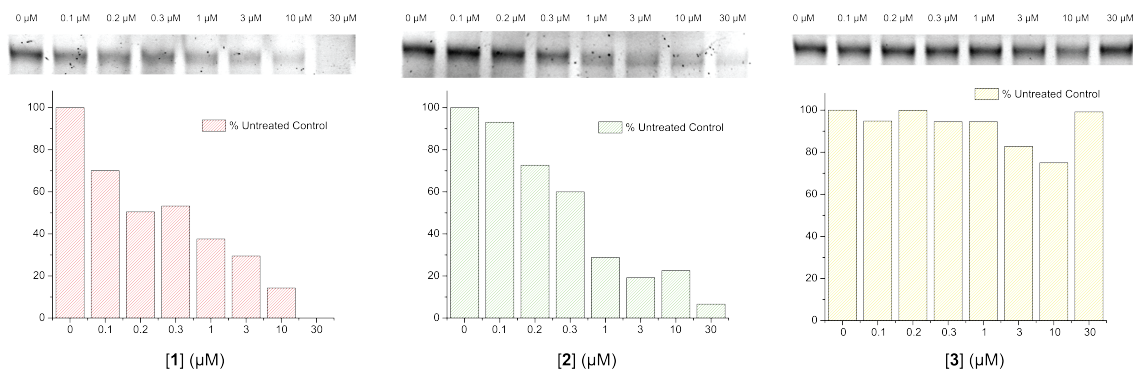

**Fig S3.** PCR inhibition of Pu22mu with compounds **1**, **2** and **3**.

**Table S1.** DFT energies (in Hartree), in vacuo and in water solution, of **1**, **2** and **3**, of the high layers of their intercalation complexes with *h-Telo*, and thermal corrections of the enthalpy and of the Gibbs free energy obtained by DFT/MM calculations of the harmonic vibration frequencies.

| Model system    | DFT Energy (vacuo) | DFT Energy (solution) | Thermal correction to Gibbs Free Energy (vacuo) | Thermal correction to Enthalpy (vacuo) |
|-----------------|--------------------|-----------------------|-------------------------------------------------|----------------------------------------|
| <b>1</b>        | -3353.338136       | -3353.521098          | 0.735400                                        | 0.855478                               |
| <b>2</b>        | -3485.471036       | -3485.652604          | 0.731248                                        | 0.854389                               |
| <b>3</b>        | -3624.393980       | -3624.586509          | 0.730531                                        | 0.853819                               |
| <i>h-Telo</i>   | -2169.692612       | -2169.767409          | 4.818576                                        | 5.703625                               |
| <b>1/h-Telo</b> | -5523.128550       | -5523.352802          | 5.605088                                        | 6.567825                               |
| <b>2/h-Telo</b> | -5655.263605       | -5655.484441          | 5.608785                                        | 6.565613                               |
| <b>3/h-Telo</b> | -5794.205408       | -5794.421682          | 5.608912                                        | 6.565472                               |

**Table S2.** Cartesian coordinates of the geometries of the intercalation complexes of **1**, **2** and **3** with *h-Telo*, fully optimized by DFT/MM calculations. Amber99 atom types, high and low layer labels are also indicated.

**1/h-Telo**

|      |           |            |          |   |
|------|-----------|------------|----------|---|
| O-OH | -3.745822 | -6.618299  | 8.997848 | 1 |
| H-HO | -3.019305 | -6.074136  | 8.655863 | 1 |
| C-CT | -4.208914 | -7.402979  | 7.905509 | 1 |
| H-H1 | -4.761907 | -6.793471  | 7.185745 | 1 |
| H-H1 | -4.876524 | -8.205118  | 8.235909 | 1 |
| C-CT | -2.992509 | -8.003332  | 7.202389 | 1 |
| H-H1 | -3.322951 | -8.540410  | 6.310270 | 1 |
| O-OS | -2.088010 | -6.963812  | 6.846181 | 1 |
| C-CT | -0.806470 | -7.541236  | 6.781797 | 1 |
| H-H2 | -0.728539 | -8.174796  | 5.890498 | 1 |
| N-N* | 0.297931  | -6.551472  | 6.807638 | 1 |
| C-CK | 1.633996  | -6.811259  | 6.607935 | 1 |
| H-H5 | 2.025172  | -7.800926  | 6.405776 | 1 |
| N-NB | 2.404612  | -5.762766  | 6.669283 | 1 |
| C-CB | 1.521105  | -4.716467  | 6.925123 | 1 |
| C-CA | 1.695895  | -3.316662  | 7.084406 | 1 |
| N-N2 | 2.875037  | -2.688882  | 7.005580 | 1 |
| H-H  | 3.718671  | -3.216788  | 6.832971 | 1 |
| H-H  | 2.905953  | -1.688483  | 7.133957 | 1 |
| N-NC | 0.616342  | -2.549929  | 7.327418 | 1 |
| C-CQ | -0.576595 | -3.134436  | 7.423800 | 1 |
| H-H5 | -1.410473 | -2.474089  | 7.621996 | 1 |
| N-NC | -0.873249 | -4.427480  | 7.303440 | 1 |
| C-CB | 0.230899  | -5.185568  | 7.033391 | 1 |
| C-CT | -2.203036 | -8.983638  | 8.075408 | 1 |
| H-H1 | -2.582923 | -9.003106  | 9.103740 | 1 |
| C-CT | -0.793295 | -8.399710  | 8.036823 | 1 |
| H-HC | -0.646337 | -7.758299  | 8.905696 | 1 |
| H-HC | -0.032756 | -9.178181  | 7.993295 | 1 |
| O-OS | -2.195033 | -10.270280 | 7.479669 | 1 |
| P-P  | -3.338207 | -11.357889 | 7.829972 | 1 |
| O-O2 | -3.533024 | -11.363560 | 9.293860 | 1 |
| O-O2 | -3.019954 | -12.608658 | 7.110464 | 1 |
| O-OS | -4.643017 | -10.697554 | 7.149597 | 1 |
| C-CT | -4.962000 | -10.929734 | 5.786480 | 1 |
| H-H1 | -5.309748 | -11.957381 | 5.667982 | 1 |
| H-H1 | -4.068384 | -10.786346 | 5.178224 | 1 |
| C-CT | -6.051982 | -9.950387  | 5.326124 | 1 |
| H-H1 | -6.915929 | -10.027988 | 5.991587 | 1 |
| O-OS | -5.482110 | -8.644534  | 5.364483 | 1 |
| C-CT | -5.348023 | -8.152264  | 4.048410 | 1 |
| H-H2 | -6.183383 | -7.468596  | 3.832946 | 1 |
| N-N* | -4.052317 | -7.451026  | 3.970702 | 1 |
| C-CK | -2.852403 | -7.854231  | 3.433001 | 1 |
| H-H5 | -2.670697 | -8.833357  | 3.011089 | 1 |
| N-NB | -1.921784 | -6.946393  | 3.474947 | 1 |
| C-CB | -2.547694 | -5.847694  | 4.059145 | 1 |
| C-C  | -2.078075 | -4.516789  | 4.295943 | 1 |
| O-O  | -0.980761 | -4.031572  | 4.015725 | 1 |

|      |            |            |           |   |
|------|------------|------------|-----------|---|
| N-NA | -3.032978  | -3.698051  | 4.885868  | 1 |
| H-H  | -2.741877  | -2.751339  | 5.080679  | 1 |
| C-CA | -4.298168  | -4.122739  | 5.216825  | 1 |
| N-N2 | -5.105852  | -3.235871  | 5.771646  | 1 |
| H-H  | -4.816671  | -2.276999  | 5.900278  | 1 |
| H-H  | -6.048204  | -3.518172  | 5.994134  | 1 |
| N-NC | -4.763191  | -5.352923  | 4.982420  | 1 |
| C-CB | -3.840514  | -6.163093  | 4.398132  | 1 |
| C-CT | -6.490388  | -10.181569 | 3.870132  | 1 |
| H-H1 | -6.456547  | -11.237425 | 3.590906  | 1 |
| C-CT | -5.437680  | -9.363307  | 3.132576  | 1 |
| H-HC | -4.507683  | -9.926030  | 3.103790  | 1 |
| H-HC | -5.735833  | -9.073215  | 2.127033  | 1 |
| O-OS | -7.801930  | -9.667554  | 3.693743  | 1 |
| P-P  | -8.531294  | -9.589396  | 2.254582  | 1 |
| O-O2 | -9.962208  | -9.904714  | 2.442741  | 1 |
| O-O2 | -7.728308  | -10.326240 | 1.255762  | 1 |
| O-OS | -8.382572  | -8.006119  | 1.975972  | 1 |
| C-CT | -9.340897  | -7.112965  | 2.528063  | 1 |
| H-H1 | -9.354378  | -7.217184  | 3.614607  | 1 |
| H-H1 | -10.326667 | -7.387737  | 2.146488  | 1 |
| C-CT | -9.107462  | -5.638619  | 2.186183  | 1 |
| H-H1 | -10.027290 | -5.090956  | 2.408668  | 1 |
| O-OS | -8.026810  | -5.065074  | 2.907463  | 1 |
| C-CT | -7.682669  | -3.844830  | 2.261509  | 1 |
| H-H2 | -7.993173  | -2.972720  | 2.857428  | 1 |
| N-N* | -6.232326  | -3.799201  | 2.009732  | 1 |
| C-CK | -5.334692  | -4.825281  | 1.860534  | 1 |
| H-H5 | -5.625804  | -5.865757  | 1.931376  | 1 |
| N-NB | -4.106683  | -4.429253  | 1.652488  | 1 |
| C-CB | -4.203636  | -3.035842  | 1.656301  | 1 |
| C-C  | -3.206725  | -2.018801  | 1.495616  | 1 |
| O-O  | -1.992203  | -2.151420  | 1.350116  | 1 |
| N-NA | -3.730875  | -0.732016  | 1.492967  | 1 |
| H-H  | -3.090447  | 0.043293   | 1.415453  | 1 |
| C-CA | -5.070696  | -0.458818  | 1.612037  | 1 |
| N-N2 | -5.416148  | 0.807108   | 1.464456  | 1 |
| H-H  | -4.700299  | 1.501274   | 1.302415  | 1 |
| H-H  | -6.389620  | 1.076977   | 1.460168  | 1 |
| N-NC | -6.013741  | -1.385470  | 1.797340  | 1 |
| C-CB | -5.511010  | -2.649799  | 1.825487  | 1 |
| C-CT | -8.703068  | -5.353660  | 0.750635  | 1 |
| H-H1 | -7.804053  | -5.936520  | 0.532498  | 1 |
| C-CT | -8.385090  | -3.873695  | 0.906443  | 1 |
| H-HC | -7.761760  | -3.506607  | 0.093239  | 1 |
| H-HC | -9.306777  | -3.297328  | 0.955234  | 1 |
| O-OS | -9.700210  | -5.569046  | -0.221409 | 1 |
| P-P  | -9.306350  | -5.566168  | -1.774421 | 1 |
| O-O2 | -10.361185 | -6.236391  | -2.555139 | 1 |
| O-O2 | -7.896860  | -5.990191  | -1.899936 | 1 |
| O-OS | -9.327517  | -4.018552  | -2.149378 | 1 |
| C-CT | -10.486151 | -3.229706  | -1.919464 | 1 |
| H-H1 | -10.769468 | -3.277889  | -0.867927 | 1 |
| H-H1 | -11.321038 | -3.644279  | -2.476671 | 1 |
| C-CT | -10.286892 | -1.750559  | -2.293444 | 1 |
| H-H1 | -11.235297 | -1.227967  | -2.150952 | 1 |
| O-OS | -9.289326  | -1.178426  | -1.446558 | 1 |
| C-CT | -8.530036  | -0.209488  | -2.146309 | 1 |

H-H

|      |            |           |           |   |
|------|------------|-----------|-----------|---|
| H-H2 | -8.577599  | 0.777606  | -1.662893 | l |
| N-N* | -7.149808  | -0.727366 | -2.164876 | h |
| C-CK | -6.782087  | -2.042720 | -2.305413 | h |
| H-H5 | -7.511376  | -2.830535 | -2.402745 | h |
| N-NB | -5.486568  | -2.213906 | -2.267309 | h |
| C-CB | -4.981467  | -0.953561 | -2.091612 | h |
| C-C  | -3.607286  | -0.581134 | -1.903090 | h |
| O-O  | -2.656346  | -1.337588 | -1.835292 | h |
| N-NA | -3.498813  | 0.817290  | -1.739822 | h |
| H-H  | -2.536174  | 1.182172  | -1.664409 | h |
| C-CA | -4.567066  | 1.675615  | -1.702940 | h |
| N-N2 | -4.282388  | 3.002530  | -1.571117 | h |
| H-H  | -3.322599  | 3.296856  | -1.359792 | h |
| H-H  | -5.045471  | 3.567281  | -1.209354 | h |
| N-NC | -5.835488  | 1.325414  | -1.838323 | h |
| C-CB | -5.982613  | -0.008046 | -2.017482 | h |
| C-CT | -9.838136  | -1.484668 | -3.732613 | l |
| H-H1 | -9.164816  | -2.275965 | -4.044279 | l |
| C-CT | -9.099241  | -0.163502 | -3.561697 | l |
| H-HC | -8.330579  | -0.027739 | -4.322008 | l |
| H-HC | -9.826534  | 0.648132  | -3.619368 | l |
| O-OS | -10.853147 | -1.255972 | -4.695402 | l |
| P-P  | -12.006184 | -2.326600 | -5.007232 | l |
| O-O2 | -11.408082 | -3.677839 | -4.968940 | l |
| O-O2 | -12.790379 | -1.874886 | -6.172127 | l |
| O-OS | -12.868327 | -2.086636 | -3.677407 | l |
| C-CT | -13.821792 | -3.014184 | -3.185426 | l |
| H-H1 | -13.406178 | -4.022799 | -3.158871 | l |
| H-H1 | -14.698063 | -3.020298 | -3.836526 | l |
| C-CT | -14.226523 | -2.601440 | -1.759392 | l |
| H-H1 | -15.065791 | -3.222300 | -1.433786 | l |
| O-OS | -13.147656 | -2.727961 | -0.833659 | l |
| C-CT | -13.531285 | -2.000630 | 0.316608  | l |
| H-H2 | -14.336496 | -2.544169 | 0.833459  | l |
| N-N* | -12.386920 | -1.769064 | 1.246645  | l |
| C-CM | -11.305860 | -0.973409 | 0.913406  | l |
| H-H4 | -11.248146 | -0.513773 | -0.060194 | l |
| C-CM | -10.298966 | -0.727919 | 1.791562  | l |
| C-CT | -9.148166  | 0.174794  | 1.376423  | l |
| H-HC | -8.437159  | -0.395301 | 0.779080  | l |
| H-HC | -9.514711  | 1.019437  | 0.790637  | l |
| H-HC | -8.630625  | 0.547812  | 2.257525  | l |
| C-C  | -10.317128 | -1.334965 | 3.115691  | l |
| O-O  | -9.443549  | -1.234060 | 3.971026  | l |
| N-NA | -11.437636 | -2.087898 | 3.386897  | l |
| H-H  | -11.511219 | -2.487733 | 4.304764  | l |
| C-C  | -12.496546 | -2.296633 | 2.533029  | l |
| O-O  | -13.493233 | -2.880469 | 2.937439  | l |
| C-CT | -14.638779 | -1.132806 | -1.640621 | l |
| H-H1 | -14.141731 | -0.542425 | -2.408571 | l |
| C-CT | -14.100001 | -0.718781 | -0.278118 | l |
| H-HC | -13.331596 | 0.033744  | -0.403996 | l |
| H-HC | -14.891276 | -0.316178 | 0.337479  | l |
| O-OS | -16.040042 | -0.946461 | -1.641241 | l |
| P-P  | -16.818018 | -0.437969 | -2.954274 | l |
| O-O2 | -18.253274 | -0.305359 | -2.635245 | l |
| O-O2 | -16.372121 | -1.233506 | -4.115412 | l |
| O-OS | -16.196552 | 1.039555  | -3.061063 | l |

|      |            |           |           |   |
|------|------------|-----------|-----------|---|
| C-CT | -15.207444 | 1.405362  | -4.020142 | 1 |
| H-H1 | -15.673249 | 1.551015  | -4.996655 | 1 |
| H-H1 | -14.452430 | 0.624177  | -4.121826 | 1 |
| C-CT | -14.524250 | 2.711024  | -3.584955 | 1 |
| H-H1 | -13.652722 | 2.893784  | -4.217847 | 1 |
| O-OS | -15.464480 | 3.768562  | -3.727109 | 1 |
| C-CT | -15.665314 | 4.405063  | -2.474939 | 1 |
| H-H2 | -15.077212 | 5.331683  | -2.428115 | 1 |
| N-N* | -17.110372 | 4.668580  | -2.281162 | 1 |
| C-CM | -18.063192 | 3.792736  | -2.758500 | 1 |
| H-H4 | -17.748935 | 2.931799  | -3.335159 | 1 |
| C-CM | -19.383372 | 3.977238  | -2.505248 | 1 |
| C-CT | -20.382587 | 2.950654  | -3.022740 | 1 |
| H-HC | -20.393294 | 2.958605  | -4.112767 | 1 |
| H-HC | -20.112521 | 1.954353  | -2.665875 | 1 |
| H-HC | -21.385078 | 3.189815  | -2.660811 | 1 |
| C-C  | -19.821023 | 5.131920  | -1.724173 | 1 |
| O-O  | -20.975644 | 5.399390  | -1.414090 | 1 |
| N-NA | -18.806445 | 5.959662  | -1.290008 | 1 |
| H-H  | -19.068452 | 6.767769  | -0.754971 | 1 |
| C-C  | -17.463332 | 5.777815  | -1.522292 | 1 |
| O-O  | -16.639176 | 6.550198  | -1.049336 | 1 |
| C-CT | -14.078599 | 2.674833  | -2.117540 | 1 |
| H-H1 | -14.036439 | 1.651908  | -1.749756 | 1 |
| C-CT | -15.187460 | 3.427797  | -1.410483 | 1 |
| H-HC | -15.979882 | 2.726663  | -1.159780 | 1 |
| H-HC | -14.845706 | 3.934420  | -0.511218 | 1 |
| O-OS | -12.837802 | 3.331021  | -1.939272 | 1 |
| P-P  | -11.591071 | 2.545028  | -1.295851 | 1 |
| O-O2 | -10.382409 | 3.384978  | -1.389454 | 1 |
| O-O2 | -11.589092 | 1.177817  | -1.849321 | 1 |
| O-OS | -12.054953 | 2.459106  | 0.239917  | 1 |
| C-CT | -12.245592 | 3.647848  | 0.999480  | 1 |
| H-H1 | -12.739006 | 4.399223  | 0.382170  | 1 |
| H-H1 | -11.277229 | 4.056183  | 1.301030  | 1 |
| C-CT | -13.125610 | 3.403680  | 2.235875  | 1 |
| H-H1 | -13.322474 | 4.365871  | 2.705557  | 1 |
| O-OS | -14.373374 | 2.819297  | 1.865315  | 1 |
| C-CT | -14.709485 | 1.891386  | 2.878214  | 1 |
| H-H2 | -15.022036 | 2.416138  | 3.791201  | 1 |
| N-N* | -15.765633 | 0.951841  | 2.437210  | 1 |
| C-CK | -15.910344 | -0.387474 | 2.733814  | 1 |
| H-H5 | -15.214014 | -0.955720 | 3.342170  | 1 |
| N-NB | -16.937917 | -0.949054 | 2.159309  | 1 |
| C-CB | -17.572846 | 0.103509  | 1.499749  | 1 |
| C-CA | -18.754800 | 0.200335  | 0.719946  | 1 |
| N-N2 | -19.538274 | -0.837403 | 0.409626  | 1 |
| H-H  | -19.290049 | -1.766809 | 0.714279  | 1 |
| H-H  | -20.346430 | -0.682667 | -0.173030 | 1 |
| N-NC | -19.141681 | 1.410771  | 0.269581  | 1 |
| C-CQ | -18.396410 | 2.474254  | 0.567506  | 1 |
| H-H5 | -18.759302 | 3.426504  | 0.205500  | 1 |
| N-NC | -17.261239 | 2.516242  | 1.262257  | 1 |
| C-CB | -16.890238 | 1.279303  | 1.705081  | 1 |
| C-CT | -12.481792 | 2.449309  | 3.258366  | 1 |
| H-H1 | -11.435106 | 2.237026  | 3.024775  | 1 |
| C-CT | -13.361733 | 1.220252  | 3.092482  | 1 |
| H-HC | -13.080913 | 0.683232  | 2.191589  | 1 |



|      |            |           |          |   |
|------|------------|-----------|----------|---|
| H-HC | -13.345234 | 0.580817  | 3.974351 | 1 |
| O-OS | -12.651233 | 2.827588  | 4.618236 | 1 |
| P-P  | -11.979303 | 4.135504  | 5.282844 | 1 |
| O-O2 | -12.039086 | 3.983103  | 6.750740 | 1 |
| O-O2 | -12.533211 | 5.344934  | 4.642881 | 1 |
| O-OS | -10.451210 | 3.988028  | 4.819974 | 1 |
| C-CT | -9.560550  | 3.082804  | 5.445738 | 1 |
| H-H1 | -9.703044  | 2.065793  | 5.078872 | 1 |
| H-H1 | -9.703441  | 3.086208  | 6.528659 | 1 |
| C-CT | -8.142134  | 3.565802  | 5.167505 | 1 |
| H-H1 | -8.079740  | 4.625443  | 5.428620 | 1 |
| O-OS | -7.217707  | 2.807546  | 5.926170 | 1 |
| C-CT | -5.931533  | 3.067569  | 5.402499 | 1 |
| H-H2 | -5.416439  | 3.849879  | 5.973860 | 1 |
| N-N* | -5.145669  | 1.828264  | 5.397204 | 1 |
| C-CK | -5.596625  | 0.533321  | 5.399864 | 1 |
| H-H5 | -6.648893  | 0.279888  | 5.477403 | 1 |
| N-NB | -4.643072  | -0.350006 | 5.294564 | 1 |
| C-CB | -3.479320  | 0.413554  | 5.215842 | 1 |
| C-C  | -2.108818  | 0.022193  | 5.087406 | 1 |
| O-O  | -1.642947  | -1.111188 | 5.008959 | 1 |
| N-NA | -1.229995  | 1.094920  | 5.041626 | 1 |
| H-H  | -0.244417  | 0.868812  | 5.044928 | 1 |
| C-CA | -1.630256  | 2.407244  | 5.091893 | 1 |
| N-N2 | -0.671363  | 3.317690  | 5.020490 | 1 |
| H-H  | 0.302854   | 3.057985  | 4.930507 | 1 |
| H-H  | -0.931246  | 4.289911  | 5.066821 | 1 |
| N-NC | -2.906982  | 2.797164  | 5.208044 | 1 |
| C-CB | -3.779633  | 1.751839  | 5.273474 | 1 |
| C-CT | -7.654855  | 3.383322  | 3.734576 | 1 |
| H-H1 | -7.904109  | 2.376365  | 3.398675 | 1 |
| C-CT | -6.156362  | 3.503764  | 3.961569 | 1 |
| H-HC | -5.636316  | 2.855603  | 3.264527 | 1 |
| H-HC | -5.828003  | 4.535208  | 3.850333 | 1 |
| O-OS | -8.128931  | 4.366795  | 2.833241 | 1 |
| P-P  | -7.735071  | 4.359522  | 1.269049 | 1 |
| O-O2 | -8.690477  | 5.222523  | 0.547404 | 1 |
| O-O2 | -7.513938  | 2.960974  | 0.843852 | 1 |
| O-OS | -6.306520  | 5.101608  | 1.304979 | 1 |
| C-CT | -6.203464  | 6.451922  | 1.742574 | 1 |
| H-H1 | -6.710487  | 6.566427  | 2.701809 | 1 |
| H-H1 | -6.694277  | 7.105358  | 1.016934 | 1 |
| C-CT | -4.744592  | 6.900650  | 1.912028 | 1 |
| H-H1 | -4.739426  | 7.937435  | 2.258209 | 1 |
| O-OS | -4.008026  | 6.103753  | 2.838475 | 1 |
| C-CT | -2.659316  | 5.983436  | 2.391049 | 1 |
| H-H2 | -1.948442  | 6.266604  | 3.177042 | 1 |
| N-N* | -2.442906  | 4.576684  | 1.974147 | 1 |
| C-CK | -3.384955  | 3.596446  | 1.811424 | 1 |
| H-H5 | -4.439857  | 3.816274  | 1.868216 | 1 |
| N-NB | -2.900592  | 2.402772  | 1.612069 | 1 |
| C-CB | -1.524277  | 2.609352  | 1.593325 | 1 |
| C-C  | -0.449443  | 1.681139  | 1.403461 | 1 |
| O-O  | -0.502063  | 0.454009  | 1.313314 | 1 |
| N-NA | 0.786500   | 2.300308  | 1.285400 | 1 |
| H-H  | 1.583326   | 1.711589  | 1.097966 | 1 |
| C-CA | 0.966615   | 3.655469  | 1.417375 | 1 |
| N-N2 | 2.188997   | 4.099139  | 1.195250 | 1 |

|      |           |           |           |   |
|------|-----------|-----------|-----------|---|
| H-H  | 2.934811  | 3.480070  | 0.915818  | l |
| H-H  | 2.351886  | 5.091766  | 1.348182  | l |
| N-NC | -0.010102 | 4.529279  | 1.697339  | l |
| C-CB | -1.237671 | 3.946371  | 1.756024  | l |
| C-CT | -3.953702 | 6.846312  | 0.617027  | l |
| H-H1 | -4.140856 | 5.887637  | 0.127298  | l |
| C-CT | -2.550930 | 6.919402  | 1.196735  | l |
| H-HC | -1.773308 | 6.616221  | 0.503415  | l |
| H-HC | -2.359006 | 7.931521  | 1.544171  | l |
| O-OS | -4.247423 | 7.955831  | -0.204453 | l |
| P-P  | -4.163605 | 7.842931  | -1.797682 | l |
| O-O2 | -4.805455 | 9.023097  | -2.404710 | l |
| O-O2 | -4.598712 | 6.483882  | -2.167907 | l |
| O-OS | -2.595091 | 7.927952  | -2.085748 | l |
| C-CT | -1.827484 | 9.008062  | -1.574346 | l |
| H-H1 | -2.056220 | 9.161507  | -0.518662 | l |
| H-H1 | -2.090782 | 9.929354  | -2.093307 | l |
| C-CT | -0.318003 | 8.758314  | -1.680948 | l |
| H-H1 | 0.168597  | 9.553490  | -1.126891 | l |
| O-OS | 0.025920  | 7.492359  | -1.113108 | l |
| C-CT | 0.688226  | 6.694072  | -2.080293 | l |
| H-H2 | 1.770827  | 6.686570  | -1.902986 | l |
| N-N* | 0.106971  | 5.339302  | -1.995075 | h |
| C-CK | -1.200225 | 5.045245  | -1.674801 | h |
| H-H5 | -1.934260 | 5.823550  | -1.525142 | h |
| N-NB | -1.424892 | 3.761036  | -1.582905 | h |
| C-CB | -0.211256 | 3.186776  | -1.874402 | h |
| C-C  | 0.103984  | 1.795946  | -1.998202 | h |
| O-O  | -0.654463 | 0.848860  | -1.831639 | h |
| N-NA | 1.439216  | 1.606007  | -2.381330 | h |
| H-H  | 1.725327  | 0.629908  | -2.545168 | h |
| C-CA | 2.300140  | 2.631272  | -2.712523 | h |
| N-N2 | 3.472639  | 2.247556  | -3.279241 | h |
| H-H  | 3.812058  | 1.285096  | -3.167906 | h |
| H-H  | 4.172850  | 2.973723  | -3.392673 | h |
| N-NC | 2.021040  | 3.915294  | -2.583424 | h |
| C-CB | 0.755407  | 4.135637  | -2.153375 | h |
| C-CT | 0.226451  | 8.802256  | -3.107043 | l |
| H-H1 | -0.465543 | 9.289955  | -3.797214 | l |
| C-CT | 0.365588  | 7.326312  | -3.430720 | l |
| H-HC | -0.595684 | 6.970242  | -3.793270 | l |
| H-HC | 1.157260  | 7.149796  | -4.158656 | l |
| O-OS | 1.502364  | 9.417148  | -3.140161 | l |
| P-P  | 1.668862  | 11.013503 | -3.299891 | l |
| O-O2 | 0.692432  | 11.479375 | -4.306639 | l |
| O-O2 | 3.100019  | 11.327912 | -3.463441 | l |
| O-OS | 1.209985  | 11.577806 | -1.858965 | l |
| C-CT | 0.024919  | 12.357359 | -1.719688 | l |
| H-H1 | -0.798010 | 11.874540 | -2.245932 | l |
| H-H1 | 0.173157  | 13.325783 | -2.192839 | l |
| C-CT | -0.409223 | 12.541146 | -0.257754 | l |
| H-H1 | -1.210796 | 13.283470 | -0.219533 | l |
| O-OS | -0.907500 | 11.285822 | 0.208492  | l |
| C-CT | -0.639730 | 11.129457 | 1.592225  | l |
| H-H2 | -1.576288 | 10.999396 | 2.152075  | l |
| N-N* | 0.239029  | 9.943804  | 1.796278  | l |
| C-CM | 1.376365  | 9.738517  | 1.043547  | l |
| H-H4 | 1.639431  | 10.428921 | 0.260371  | l |

H-H

|      |           |           |           |   |
|------|-----------|-----------|-----------|---|
| C-CM | 2.167897  | 8.653442  | 1.220268  | 1 |
| C-CT | 3.382800  | 8.485561  | 0.321824  | 1 |
| H-HC | 3.068520  | 8.181062  | -0.677312 | 1 |
| H-HC | 3.931610  | 9.420737  | 0.236402  | 1 |
| H-HC | 4.044173  | 7.719561  | 0.721278  | 1 |
| C-C  | 1.842391  | 7.674135  | 2.250273  | 1 |
| O-O  | 2.490288  | 6.671022  | 2.533807  | 1 |
| N-NA | 0.698175  | 7.941854  | 2.964434  | 1 |
| H-H  | 0.457093  | 7.295654  | 3.691025  | 1 |
| C-C  | -0.130438 | 9.023876  | 2.777359  | 1 |
| O-O  | -1.151802 | 9.125882  | 3.446461  | 1 |
| C-CT | 0.668264  | 12.974380 | 0.744575  | 1 |
| H-H1 | 1.611569  | 12.475230 | 0.522139  | 1 |
| C-CT | 0.039917  | 12.424781 | 2.020968  | 1 |
| H-HC | 0.769082  | 12.256766 | 2.809397  | 1 |
| H-HC | -0.719433 | 13.122667 | 2.372958  | 1 |
| O-OS | 0.867474  | 14.366048 | 0.929550  | 1 |
| P-P  | 1.563198  | 15.287738 | -0.192557 | 1 |
| O-O2 | 2.136357  | 16.475668 | 0.469828  | 1 |
| O-O2 | 0.622339  | 15.447601 | -1.318049 | 1 |
| O-OS | 2.788854  | 14.363651 | -0.671476 | 1 |
| C-CT | 3.256181  | 14.381816 | -2.017194 | 1 |
| H-H1 | 3.200723  | 15.399586 | -2.409970 | 1 |
| H-H1 | 2.620948  | 13.747339 | -2.634409 | 1 |
| C-CT | 4.721049  | 13.924921 | -2.133304 | 1 |
| H-H1 | 4.968505  | 13.779550 | -3.188722 | 1 |
| O-OS | 5.512346  | 14.971864 | -1.576976 | 1 |
| C-CT | 6.352953  | 14.412700 | -0.586506 | 1 |
| H-H2 | 7.290718  | 14.065934 | -1.043773 | 1 |
| N-N* | 6.612381  | 15.370256 | 0.504290  | 1 |
| C-CM | 5.687718  | 16.333372 | 0.845227  | 1 |
| H-H4 | 4.771048  | 16.412628 | 0.271225  | 1 |
| C-CM | 5.905884  | 17.174956 | 1.887400  | 1 |
| C-CT | 4.850598  | 18.216696 | 2.234697  | 1 |
| H-HC | 4.932696  | 19.064644 | 1.554730  | 1 |
| H-HC | 3.852402  | 17.783078 | 2.160714  | 1 |
| H-HC | 5.002689  | 18.567907 | 3.257284  | 1 |
| C-C  | 7.132486  | 17.057737 | 2.674122  | 1 |
| O-O  | 7.419073  | 17.714240 | 3.669314  | 1 |
| N-NA | 8.011042  | 16.083128 | 2.250445  | 1 |
| H-H  | 8.868628  | 15.976254 | 2.759812  | 1 |
| C-C  | 7.809115  | 15.225993 | 1.196391  | 1 |
| O-O  | 8.652052  | 14.385136 | 0.901774  | 1 |
| C-CT | 5.077044  | 12.638581 | -1.368652 | 1 |
| H-H1 | 4.210087  | 11.978613 | -1.260779 | 1 |
| C-CT | 5.562474  | 13.231486 | -0.056961 | 1 |
| H-HC | 4.730560  | 13.578199 | 0.547532  | 1 |
| H-HC | 6.185935  | 12.557710 | 0.514884  | 1 |
| O-OS | 6.178214  | 12.001119 | -2.007998 | 1 |
| P-P  | 6.509298  | 10.431000 | -1.823454 | 1 |
| O-O2 | 7.680523  | 10.101325 | -2.661361 | 1 |
| O-O2 | 5.250146  | 9.674386  | -1.967956 | 1 |
| O-OS | 6.961585  | 10.352984 | -0.277036 | 1 |
| C-CT | 8.262099  | 10.740721 | 0.166322  | 1 |
| H-H1 | 8.469636  | 11.776058 | -0.114672 | 1 |
| H-H1 | 9.012755  | 10.099142 | -0.300036 | 1 |
| C-CT | 8.376752  | 10.622665 | 1.697167  | 1 |
| H-H1 | 9.416274  | 10.779675 | 1.997615  | 1 |

|      |           |           |           |   |
|------|-----------|-----------|-----------|---|
| O-OS | 7.542861  | 11.611392 | 2.290400  | 1 |
| C-CT | 6.647384  | 10.997541 | 3.194201  | 1 |
| H-H2 | 7.090926  | 10.982402 | 4.197563  | 1 |
| N-N* | 5.398675  | 11.789998 | 3.172444  | 1 |
| C-CK | 4.168870  | 11.467337 | 2.651466  | 1 |
| H-H5 | 3.930096  | 10.505199 | 2.226551  | 1 |
| N-NB | 3.313742  | 12.446552 | 2.657180  | 1 |
| C-CB | 3.989775  | 13.474750 | 3.309841  | 1 |
| C-CA | 3.630927  | 14.793849 | 3.684581  | 1 |
| N-N2 | 2.468573  | 15.374915 | 3.372317  | 1 |
| H-H  | 1.826649  | 14.918368 | 2.731054  | 1 |
| H-H  | 2.281442  | 16.314214 | 3.685006  | 1 |
| N-NC | 4.514646  | 15.529734 | 4.385515  | 1 |
| C-CQ | 5.705793  | 15.003525 | 4.679274  | 1 |
| H-H5 | 6.383108  | 15.647245 | 5.229760  | 1 |
| N-NC | 6.176758  | 13.797445 | 4.357149  | 1 |
| C-CB | 5.253924  | 13.068053 | 3.666113  | 1 |
| C-CT | 7.893756  | 9.262189  | 2.218460  | 1 |
| H-H1 | 7.908427  | 8.508971  | 1.424207  | 1 |
| C-CT | 6.479155  | 9.573353  | 2.674037  | 1 |
| H-HC | 5.826429  | 9.550393  | 1.806320  | 1 |
| H-HC | 6.132619  | 8.894260  | 3.451978  | 1 |
| O-OS | 8.613646  | 8.833408  | 3.358907  | 1 |
| P-P  | 9.937993  | 7.936587  | 3.207478  | 1 |
| O-O2 | 10.545419 | 7.745416  | 4.539709  | 1 |
| O-O2 | 10.728629 | 8.457983  | 2.073300  | 1 |
| O-OS | 9.223901  | 6.569103  | 2.758506  | 1 |
| C-CT | 8.472364  | 5.790932  | 3.678901  | 1 |
| H-H1 | 7.860210  | 6.429630  | 4.318029  | 1 |
| H-H1 | 9.134055  | 5.200058  | 4.314734  | 1 |
| C-CT | 7.557095  | 4.864699  | 2.883735  | 1 |
| H-H1 | 8.169078  | 4.213077  | 2.249126  | 1 |
| O-OS | 6.735114  | 4.098149  | 3.762285  | 1 |
| C-CT | 5.531623  | 3.925066  | 3.053345  | 1 |
| H-H2 | 5.737264  | 3.301594  | 2.176020  | 1 |
| N-N* | 4.441770  | 3.289905  | 3.813170  | 1 |
| C-CK | 3.229979  | 3.806041  | 4.214532  | 1 |
| H-H5 | 2.998929  | 4.866232  | 4.212677  | 1 |
| N-NB | 2.355407  | 2.899810  | 4.559529  | 1 |
| C-CB | 3.028637  | 1.693474  | 4.362323  | 1 |
| C-C  | 2.579105  | 0.336422  | 4.468982  | 1 |
| O-O  | 1.459410  | -0.077020 | 4.760936  | 1 |
| N-NA | 3.556038  | -0.597446 | 4.147068  | 1 |
| H-H  | 3.299121  | -1.571317 | 4.244407  | 1 |
| C-CA | 4.820330  | -0.256974 | 3.729133  | 1 |
| N-N2 | 5.643764  | -1.249453 | 3.436881  | 1 |
| H-H  | 5.360549  | -2.216121 | 3.523775  | 1 |
| H-H  | 6.575555  | -1.030461 | 3.113241  | 1 |
| N-NC | 5.244412  | 1.001500  | 3.578790  | 1 |
| C-CB | 4.309716  | 1.928321  | 3.926318  | 1 |
| C-CT | 6.587799  | 5.646458  | 1.978944  | 1 |
| H-H1 | 6.813968  | 6.711373  | 1.940967  | 1 |
| C-CT | 5.245525  | 5.343336  | 2.611216  | 1 |
| H-HC | 5.057658  | 5.985079  | 3.470809  | 1 |
| H-HC | 4.440980  | 5.382184  | 1.887313  | 1 |
| O-OS | 6.599678  | 5.051052  | 0.701953  | 1 |
| P-P  | 6.044060  | 5.766981  | -0.616921 | 1 |
| O-O2 | 6.662917  | 7.102979  | -0.715449 | 1 |

|      |           |           |           |       |
|------|-----------|-----------|-----------|-------|
| O-O2 | 4.577907  | 5.591255  | -0.660640 | l     |
| O-OS | 6.711593  | 4.770628  | -1.682273 | l     |
| C-CT | 8.116770  | 4.550237  | -1.678602 | l     |
| H-H1 | 8.603330  | 5.188008  | -0.937271 | l     |
| H-H1 | 8.514598  | 4.801772  | -2.662761 | l     |
| C-CT | 8.467051  | 3.088669  | -1.362251 | l     |
| H-H1 | 9.554350  | 2.980742  | -1.424084 | l     |
| O-OS | 8.031775  | 2.648731  | -0.070319 | l     |
| C-CT | 7.688895  | 1.269969  | -0.128494 | l     |
| H-H2 | 8.193948  | 0.683568  | 0.652113  | l     |
| N-N* | 6.218846  | 1.109770  | -0.005006 | l     |
| C-CK | 5.246871  | 2.079213  | -0.001222 | l     |
| H-H5 | 5.484545  | 3.126596  | -0.139377 | l     |
| N-NB | 4.037137  | 1.628225  | 0.198723  | l     |
| C-CB | 4.212808  | 0.244552  | 0.291660  | l     |
| C-C  | 3.259724  | -0.815139 | 0.461164  | l     |
| O-O  | 2.040306  | -0.740028 | 0.596286  | l     |
| N-NA | 3.829107  | -2.080452 | 0.434286  | l     |
| H-H  | 3.214303  | -2.867014 | 0.572878  | l     |
| C-CA | 5.172290  | -2.303492 | 0.268891  | l     |
| N-N2 | 5.538096  | -3.574243 | 0.206826  | l     |
| H-H  | 4.847480  | -4.306888 | 0.296855  | l     |
| H-H  | 6.513020  | -3.788790 | 0.071653  | l     |
| N-NC | 6.084949  | -1.332424 | 0.129912  | l     |
| C-CB | 5.542986  | -0.080847 | 0.150941  | l     |
| C-CT | 7.842612  | 2.103133  | -2.339601 | l     |
| H-H1 | 6.773214  | 2.315559  | -2.417474 | l     |
| C-CT | 8.120869  | 0.846697  | -1.523648 | l     |
| H-HC | 7.580005  | -0.025891 | -1.846673 | l     |
| H-HC | 9.181989  | 0.623390  | -1.541366 | l     |
| O-OS | 8.482413  | 2.114173  | -3.602352 | l     |
| P-P  | 7.747473  | 1.582979  | -4.938173 | l     |
| O-O2 | 8.481819  | 2.067884  | -6.121336 | l     |
| O-O2 | 6.295873  | 1.830591  | -4.798657 | l     |
| O-OS | 7.950518  | -0.001662 | -4.848611 | l     |
| C-CT | 9.220241  | -0.559171 | -4.551048 | l     |
| H-H1 | 9.720203  | 0.036840  | -3.785973 | l     |
| H-H1 | 9.859000  | -0.535355 | -5.432800 | l     |
| C-CT | 9.108121  | -1.988586 | -4.002257 | l     |
| H-H1 | 10.070363 | -2.227347 | -3.563088 | l     |
| O-OS | 8.089032  | -2.069366 | -3.001739 | l     |
| C-CT | 7.062448  | -2.953862 | -3.418336 | l H-H |
| H-H2 | 7.113466  | -3.886882 | -2.844020 | l     |
| N-N* | 5.747829  | -2.287475 | -3.263469 | h     |
| C-CK | 5.497589  | -0.933605 | -3.215666 | h     |
| H-H5 | 6.270254  | -0.201923 | -3.364280 | h     |
| N-NB | 4.234390  | -0.651036 | -3.036726 | h     |
| C-CB | 3.618123  | -1.879336 | -3.001255 | h     |
| C-C  | 2.228915  | -2.179090 | -2.899960 | h     |
| O-O  | 1.298180  | -1.383469 | -2.770192 | h     |
| N-NA | 1.999791  | -3.558464 | -2.998776 | h     |
| H-H  | 1.012597  | -3.848007 | -2.944975 | h     |
| C-CA | 2.977979  | -4.487894 | -3.270073 | h     |
| N-N2 | 2.552533  | -5.735670 | -3.585136 | h     |
| H-H  | 1.596008  | -6.036312 | -3.376507 | h     |
| H-H  | 3.281698  | -6.436445 | -3.613484 | h     |
| N-NC | 4.269300  | -4.227506 | -3.303132 | h     |
| C-CB | 4.528669  | -2.909033 | -3.167022 | h     |

|      |           |           |           |   |
|------|-----------|-----------|-----------|---|
| C-CT | 8.812444  | -3.057958 | -5.051715 | 1 |
| H-H1 | 9.064955  | -2.731022 | -6.062267 | 1 |
| C-CT | 7.316148  | -3.232309 | -4.889678 | 1 |
| H-HC | 6.819736  | -2.468035 | -5.472635 | 1 |
| H-HC | 6.988604  | -4.230131 | -5.179302 | 1 |
| O-OS | 9.470470  | -4.267275 | -4.721786 | 1 |
| P-P  | 10.953199 | -4.598122 | -5.264700 | 1 |
| O-O2 | 10.950358 | -4.396014 | -6.729422 | 1 |
| O-O2 | 11.393224 | -5.885406 | -4.692520 | 1 |
| O-OS | 11.845495 | -3.432091 | -4.595104 | 1 |
| C-CT | 12.397035 | -2.388157 | -5.391965 | 1 |
| H-H1 | 11.609804 | -1.911171 | -5.973626 | 1 |
| H-H1 | 13.104272 | -2.812510 | -6.103473 | 1 |
| C-CT | 13.088959 | -1.307712 | -4.550125 | 1 |
| H-H1 | 13.643265 | -0.635218 | -5.209423 | 1 |
| O-OS | 12.099955 | -0.573047 | -3.832956 | 1 |
| C-CT | 12.669205 | -0.024509 | -2.652572 | 1 |
| H-H2 | 12.716507 | 1.071661  | -2.720681 | 1 |
| N-N* | 11.853731 | -0.425516 | -1.476992 | 1 |
| C-CM | 11.324391 | -1.693512 | -1.355360 | 1 |
| H-H4 | 11.534480 | -2.431510 | -2.114889 | 1 |
| C-CM | 10.513845 | -2.026850 | -0.318997 | 1 |
| C-CT | 9.901594  | -3.417548 | -0.277398 | 1 |
| H-HC | 8.994389  | -3.396671 | 0.326111  | 1 |
| H-HC | 9.637216  | -3.750105 | -1.283566 | 1 |
| H-HC | 10.607469 | -4.120916 | 0.159831  | 1 |
| C-C  | 10.229662 | -1.053831 | 0.731654  | 1 |
| O-O  | 9.497659  | -1.221202 | 1.701760  | 1 |
| N-NA | 10.851085 | 0.166259  | 0.574854  | 1 |
| H-H  | 10.717089 | 0.855493  | 1.291957  | 1 |
| C-C  | 11.628679 | 0.540604  | -0.496595 | 1 |
| O-O  | 12.049741 | 1.688245  | -0.574049 | 1 |
| C-CT | 14.042363 | -1.815463 | -3.471384 | 1 |
| H-H1 | 13.580992 | -2.656503 | -2.956345 | 1 |
| C-CT | 14.077816 | -0.600194 | -2.560845 | 1 |
| H-HC | 14.349874 | -0.870531 | -1.543616 | 1 |
| H-HC | 14.787039 | 0.127864  | -2.954161 | 1 |
| O-OS | 15.378458 | -2.085878 | -3.855327 | 1 |
| P-P  | 15.812656 | -3.475570 | -4.541237 | 1 |
| O-O2 | 17.242969 | -3.694707 | -4.250915 | 1 |
| O-O2 | 15.311361 | -3.528029 | -5.926959 | 1 |
| O-OS | 14.965412 | -4.496441 | -3.639266 | 1 |
| C-CT | 15.101168 | -5.903525 | -3.760529 | 1 |
| H-H1 | 16.138707 | -6.159433 | -3.990380 | 1 |
| H-H1 | 14.457757 | -6.266909 | -4.564282 | 1 |
| C-CT | 14.736102 | -6.586202 | -2.432234 | 1 |
| H-H1 | 14.738942 | -7.670267 | -2.572114 | 1 |
| O-OS | 15.739074 | -6.211757 | -1.490720 | 1 |
| C-CT | 15.117877 | -5.661059 | -0.345777 | 1 |
| H-H2 | 14.921855 | -6.453862 | 0.385577  | 1 |
| N-N* | 15.967062 | -4.593569 | 0.228035  | 1 |
| C-CM | 16.442426 | -3.570003 | -0.562858 | 1 |
| H-H4 | 16.321305 | -3.642413 | -1.636340 | 1 |
| C-CM | 17.041277 | -2.480810 | -0.017651 | 1 |
| C-CT | 17.521432 | -1.352561 | -0.920540 | 1 |
| H-HC | 17.549586 | -1.665055 | -1.966742 | 1 |
| H-HC | 16.857834 | -0.495336 | -0.811073 | 1 |
| H-HC | 18.525461 | -1.053293 | -0.613771 | 1 |

|      |           |            |           |   |
|------|-----------|------------|-----------|---|
| C-C  | 17.202934 | -2.388572  | 1.431287  | 1 |
| O-O  | 17.658597 | -1.431424  | 2.046891  | 1 |
| N-NA | 16.794620 | -3.500232  | 2.137067  | 1 |
| H-H  | 16.945401 | -3.500376  | 3.128459  | 1 |
| C-C  | 16.211464 | -4.623287  | 1.598394  | 1 |
| O-O  | 15.941194 | -5.582399  | 2.313487  | 1 |
| C-CT | 13.376546 | -6.167499  | -1.849346 | 1 |
| H-H1 | 12.706879 | -5.785956  | -2.626464 | 1 |
| C-CT | 13.801566 | -5.091372  | -0.862889 | 1 |
| H-HC | 13.960550 | -4.151824  | -1.379998 | 1 |
| H-HC | 13.084634 | -4.952860  | -0.066028 | 1 |
| O-OS | 12.805581 | -7.267728  | -1.153866 | 1 |
| P-P  | 11.275501 | -7.273355  | -0.629480 | 1 |
| O-O2 | 10.898276 | -8.662019  | -0.300887 | 1 |
| O-O2 | 10.452931 | -6.460453  | -1.547336 | 1 |
| O-OS | 11.395831 | -6.463826  | 0.753021  | 1 |
| C-CT | 12.191886 | -6.949468  | 1.825364  | 1 |
| H-H1 | 13.162496 | -7.282003  | 1.457040  | 1 |
| H-H1 | 11.700944 | -7.803707  | 2.295073  | 1 |
| C-CT | 12.426648 | -5.848041  | 2.866774  | 1 |
| H-H1 | 13.001562 | -6.268015  | 3.697740  | 1 |
| O-OS | 13.152277 | -4.756823  | 2.330024  | 1 |
| C-CT | 12.974584 | -3.705002  | 3.243816  | 1 |
| H-H2 | 13.495577 | -3.913667  | 4.187745  | 1 |
| N-N* | 13.469935 | -2.455331  | 2.644112  | 1 |
| C-CK | 13.520922 | -2.098654  | 1.321716  | 1 |
| H-H5 | 13.141343 | -2.732958  | 0.535766  | 1 |
| N-NB | 14.068687 | -0.937128  | 1.097352  | 1 |
| C-CB | 14.407182 | -0.483393  | 2.371899  | 1 |
| C-CA | 15.016457 | 0.699291   | 2.865073  | 1 |
| N-N2 | 15.391115 | 1.729962   | 2.098785  | 1 |
| H-H  | 15.226179 | 1.706050   | 1.103608  | 1 |
| H-H  | 15.823818 | 2.530854   | 2.533298  | 1 |
| N-NC | 15.222042 | 0.818153   | 4.192270  | 1 |
| C-CQ | 14.843660 | -0.176469  | 4.996383  | 1 |
| H-H5 | 15.037971 | -0.027010  | 6.050911  | 1 |
| N-NC | 14.252205 | -1.326387  | 4.667321  | 1 |
| C-CB | 14.058995 | -1.415773  | 3.320430  | 1 |
| C-CT | 11.137009 | -5.222041  | 3.415791  | 1 |
| H-H1 | 10.299913 | -5.413886  | 2.740843  | 1 |
| C-CT | 11.466052 | -3.725716  | 3.441649  | 1 |
| H-HC | 10.979952 | -3.226449  | 2.606306  | 1 |
| H-HC | 11.181166 | -3.256066  | 4.382655  | 1 |
| O-OS | 10.829072 | -5.640699  | 4.731662  | 1 |
| P-P  | 10.514578 | -7.180313  | 5.095729  | 1 |
| O-O2 | 9.807597  | -7.219507  | 6.391056  | 1 |
| O-O2 | 11.740310 | -7.979828  | 4.895704  | 1 |
| O-OS | 9.477428  | -7.610921  | 3.945888  | 1 |
| C-CT | 8.912964  | -8.914339  | 3.962561  | 1 |
| H-H1 | 8.541574  | -9.133013  | 4.967381  | 1 |
| H-H1 | 9.681620  | -9.646095  | 3.709495  | 1 |
| C-CT | 7.729456  | -9.059485  | 3.000420  | 1 |
| H-H1 | 7.432064  | -10.110219 | 2.976459  | 1 |
| O-OS | 6.657609  | -8.278936  | 3.515493  | 1 |
| C-CT | 6.137455  | -7.518187  | 2.451898  | 1 |
| H-H2 | 5.425665  | -8.129511  | 1.879221  | 1 |
| N-N* | 5.477973  | -6.310236  | 2.977116  | 1 |
| C-CK | 6.011870  | -5.087624  | 3.304617  | 1 |

|      |           |            |           |   |
|------|-----------|------------|-----------|---|
| H-H5 | 7.073707  | -4.877309  | 3.307000  | 1 |
| N-NB | 5.119290  | -4.185637  | 3.600774  | 1 |
| C-CB | 3.907493  | -4.867123  | 3.500045  | 1 |
| C-C  | 2.560504  | -4.414206  | 3.668799  | 1 |
| O-O  | 2.164328  | -3.273372  | 3.900022  | 1 |
| N-NA | 1.620149  | -5.427282  | 3.526932  | 1 |
| H-H  | 0.656019  | -5.165949  | 3.682817  | 1 |
| C-CA | 1.946269  | -6.725473  | 3.214045  | 1 |
| N-N2 | 0.946138  | -7.577188  | 3.073054  | 1 |
| H-H  | -0.015241 | -7.276670  | 3.167726  | 1 |
| H-H  | 1.158034  | -8.517419  | 2.774997  | 1 |
| N-NC | 3.193091  | -7.157102  | 3.001714  | 1 |
| C-CB | 4.126085  | -6.181906  | 3.169744  | 1 |
| C-CT | 7.984345  | -8.593803  | 1.556580  | 1 |
| H-H1 | 9.048883  | -8.571924  | 1.309271  | 1 |
| C-CT | 7.349828  | -7.209906  | 1.588696  | 1 |
| H-HC | 8.021437  | -6.518185  | 2.091154  | 1 |
| H-HC | 7.063887  | -6.840791  | 0.607937  | 1 |
| O-OS | 7.251451  | -9.464143  | 0.708538  | 1 |
| P-P  | 7.352644  | -9.453641  | -0.904012 | 1 |
| O-O2 | 8.086353  | -10.657790 | -1.341632 | 1 |
| O-O2 | 7.739874  | -8.109865  | -1.377453 | 1 |
| O-OS | 5.791232  | -9.651368  | -1.222067 | 1 |
| C-CT | 5.101023  | -10.804806 | -0.762811 | 1 |
| H-H1 | 5.248490  | -10.912477 | 0.313466  | 1 |
| H-H1 | 5.498357  | -11.690826 | -1.260370 | 1 |
| C-CT | 3.595375  | -10.695251 | -1.023152 | 1 |
| H-H1 | 3.116049  | -11.630986 | -0.727653 | 1 |
| O-OS | 3.081288  | -9.622169  | -0.239713 | 1 |
| C-CT | 2.269119  | -8.830678  | -1.077099 | 1 |
| H-H2 | 1.254623  | -9.247923  | -1.122623 | 1 |
| N-N* | 2.256622  | -7.446358  | -0.573124 | 1 |
| C-CK | 3.309479  | -6.581117  | -0.402498 | 1 |
| H-H5 | 4.333471  | -6.868991  | -0.617205 | 1 |
| N-NB | 2.959191  | -5.396563  | 0.025685  | 1 |
| C-CB | 1.572732  | -5.502660  | 0.185377  | 1 |
| C-C  | 0.600186  | -4.555087  | 0.647721  | 1 |
| O-O  | 0.767583  | -3.385667  | 0.986311  | 1 |
| N-NA | -0.691429 | -5.061345  | 0.695100  | 1 |
| H-H  | -1.414331 | -4.470812  | 1.076751  | 1 |
| C-CA | -1.016111 | -6.340092  | 0.321300  | 1 |
| N-N2 | -2.300283 | -6.651103  | 0.370269  | 1 |
| H-H  | -2.982508 | -5.986047  | 0.711122  | 1 |
| H-H  | -2.586651 | -7.573024  | 0.077854  | 1 |
| N-NC | -0.133537 | -7.237880  | -0.130119 | 1 |
| C-CB | 1.142228  | -6.760894  | -0.163326 | 1 |
| C-CT | 3.252522  | -10.412612 | -2.493118 | 1 |
| H-H1 | 4.095220  | -10.633953 | -3.155351 | 1 |
| C-CT | 2.931169  | -8.926165  | -2.443353 | 1 |
| H-HC | 3.859449  | -8.357471  | -2.462319 | 1 |
| H-HC | 2.261089  | -8.616573  | -3.239983 | 1 |
| O-OS | 2.097426  | -11.155027 | -2.846966 | 1 |
| P-P  | 1.658441  | -11.389393 | -4.380759 | 1 |
| O-O2 | 1.910224  | -12.801313 | -4.729773 | 1 |
| O-O2 | 2.206715  | -10.296400 | -5.211249 | 1 |
| O-OS | 0.076533  | -11.159796 | -4.262977 | 1 |
| C-CT | -0.735667 | -12.016534 | -3.469835 | 1 |
| H-H1 | -0.308656 | -12.085020 | -2.467769 | 1 |



|       |           |            |           |   |     |
|-------|-----------|------------|-----------|---|-----|
| H-H1  | -0.755524 | -13.014335 | -3.909533 | l |     |
| C-CT  | -2.169083 | -11.477861 | -3.332068 | l |     |
| H-H1  | -2.755298 | -12.171888 | -2.727769 | l |     |
| O-OS  | -2.076528 | -10.223706 | -2.669368 | l |     |
| C-CT  | -2.694195 | -9.253141  | -3.483124 | l | H-H |
| H-H2  | -3.744281 | -9.154603  | -3.188876 | l |     |
| N-N*  | -1.958201 | -7.990092  | -3.335512 | h |     |
| C-CK  | -0.621219 | -7.778371  | -3.573758 | h |     |
| H-H5  | 0.021212  | -8.583992  | -3.905836 | h |     |
| N-NB  | -0.262697 | -6.543273  | -3.326836 | h |     |
| C-CB  | -1.417773 | -5.926083  | -2.896191 | h |     |
| C-C   | -1.634058 | -4.562253  | -2.500856 | h |     |
| O-O   | -0.807813 | -3.657761  | -2.457380 | h |     |
| N-NA  | -2.976986 | -4.350452  | -2.134381 | h |     |
| H-H   | -3.234778 | -3.376021  | -1.927138 | h |     |
| C-CA  | -3.946841 | -5.326412  | -2.122363 | h |     |
| N-N2  | -5.148653 | -4.983103  | -1.586008 | h |     |
| H-H   | -5.402918 | -3.997357  | -1.619245 | h |     |
| H-H   | -5.918860 | -5.636667  | -1.743596 | h |     |
| N-NC  | -3.763742 | -6.566180  | -2.533421 | h |     |
| C-CB  | -2.481352 | -6.803943  | -2.897135 | h |     |
| C-CT  | -2.887586 | -11.242504 | -4.675245 | l |     |
| H-H1  | -2.471476 | -11.864567 | -5.474585 | l |     |
| C-CT  | -2.612990 | -9.773031  | -4.914244 | l |     |
| H-HC  | -1.612790 | -9.648763  | -5.324652 | l |     |
| H-HC  | -3.357840 | -9.318018  | -5.561756 | l |     |
| O-OH  | -4.301562 | -11.368916 | -4.576116 | l |     |
| H-HO  | -4.538819 | -12.288539 | -4.412458 | l |     |
| K-K   | -0.277696 | -1.507240  | -0.600276 | l |     |
| K-K   | 0.140059  | -1.749098  | 3.135991  | l |     |
| Ni-Ni | -0.871200 | -1.232997  | -5.001315 | h |     |
| N-NC  | 0.679883  | -0.151336  | -5.303977 | h |     |
| N-NC  | 0.259196  | -2.698524  | -5.567604 | h |     |
| C-CA  | -0.123123 | -3.932758  | -5.687603 | h |     |
| H-HA  | 0.619351  | -4.705097  | -5.903397 | h |     |
| C-CA  | -1.492810 | -4.375573  | -5.660725 | h |     |
| C-CA  | -2.567717 | -3.478893  | -5.362107 | h |     |
| O-OS  | -2.418834 | -2.289543  | -4.906996 | h |     |
| C-CA  | 1.588614  | -2.290572  | -5.880200 | h |     |
| C-CA  | 1.826020  | -0.893558  | -5.695538 | h |     |
| C-CA  | 3.064893  | -0.361978  | -5.959185 | h |     |
| H-HA  | 3.299981  | 0.680882   | -5.760814 | h |     |
| C-CA  | 2.580087  | -3.089459  | -6.407748 | h |     |
| H-HA  | 2.420128  | -4.147545  | -6.592350 | h |     |
| C-CA  | 3.824880  | -2.531890  | -6.800564 | h |     |
| C-CA  | 4.076951  | -1.154818  | -6.547269 | h |     |
| C-CA  | 5.304173  | -0.579859  | -6.974143 | h |     |
| C-CA  | 6.207847  | -1.321428  | -7.692566 | h |     |
| C-CA  | 5.949100  | -2.691993  | -7.967776 | h |     |
| C-CA  | 4.801315  | -3.289429  | -7.505314 | h |     |
| H-HA  | 5.504962  | 0.465973   | -6.747112 | h |     |
| H-HA  | 7.128034  | -0.856308  | -8.031816 | h |     |
| H-HA  | 6.672172  | -3.267590  | -8.536086 | h |     |
| H-HA  | 4.610476  | -4.340198  | -7.704677 | h |     |
| C-CA  | -1.777596 | -5.691799  | -6.077520 | h |     |
| C-CA  | -3.073335 | -6.127793  | -6.282715 | h |     |
| C-CA  | -4.142961 | -5.219981  | -6.100933 | h |     |
| C-CA  | -3.890133 | -3.943164  | -5.632184 | h |     |

|      |           |           |           |   |
|------|-----------|-----------|-----------|---|
| H-HA | -0.949144 | -6.368199 | -6.276069 | h |
| H-HA | -3.260315 | -7.128488 | -6.660900 | h |
| C-CT | -5.507329 | -5.603606 | -6.632664 | h |
| H-HA | -4.667087 | -3.194159 | -5.509911 | h |
| C-CA | 0.698716  | 1.141488  | -5.319682 | h |
| C-CA | -0.427443 | 1.991365  | -5.072490 | h |
| H-HA | 1.628639  | 1.658001  | -5.565817 | h |
| C-CA | -1.711366 | 1.470017  | -4.705812 | h |
| C-CA | -2.752210 | 2.428180  | -4.511401 | h |
| C-CA | -2.534960 | 3.780186  | -4.691618 | h |
| C-CA | -1.260815 | 4.271777  | -5.045456 | h |
| C-CA | -0.228222 | 3.377453  | -5.223822 | h |
| O-OS | -1.970543 | 0.224182  | -4.541106 | h |
| H-HA | -3.722936 | 2.047824  | -4.199969 | h |
| C-CT | -3.641011 | 4.767471  | -4.454002 | h |
| H-HA | -1.103144 | 5.337181  | -5.175652 | h |
| H-HA | 0.764417  | 3.741582  | -5.481968 | h |
| N-N3 | -6.632574 | -5.784399 | -5.623807 | h |
| H-HC | -5.863991 | -4.850711 | -7.336555 | h |
| H-HC | -5.450973 | -6.547622 | -7.175217 | h |
| H-HC | -3.223772 | 5.755495  | -4.242039 | h |
| H-HC | -4.248053 | 4.480683  | -3.592785 | h |
| N-N3 | -4.608955 | 4.965819  | -5.625523 | h |
| C-CT | -6.836044 | -4.533639 | -4.791766 | h |
| C-CT | -7.900477 | -6.083900 | -6.400495 | h |
| C-CT | -6.305749 | -6.910684 | -4.660039 | h |
| C-CT | -9.138326 | -6.261530 | -5.534969 | h |
| H-HC | -8.044055 | -5.252875 | -7.091058 | h |
| H-HC | -7.703762 | -6.979122 | -6.988403 | h |
| H-HC | -7.105776 | -6.897045 | -3.917626 | h |
| C-CT | -6.224040 | -8.300210 | -5.270674 | h |
| H-HC | -5.381251 | -6.629145 | -4.152192 | h |
| H-HC | -7.615798 | -4.782972 | -4.064993 | h |
| H-HC | -5.919898 | -4.376036 | -4.222564 | h |
| C-CT | -7.254006 | -3.306551 | -5.592958 | h |
| H-HC | -6.671799 | -3.154968 | -6.500583 | h |
| H-HC | -8.315427 | -3.351561 | -5.856869 | h |
| H-HC | -7.095363 | -2.431608 | -4.958920 | h |
| H-HC | -9.048430 | -7.070842 | -4.807194 | h |
| H-HC | -9.402540 | -5.356249 | -4.978533 | h |
| H-HC | -9.988740 | -6.488354 | -6.177016 | h |
| H-HC | -7.191099 | -8.644240 | -5.643033 | h |
| H-HC | -5.482024 | -8.390004 | -6.062580 | h |
| H-HC | -5.938535 | -8.988594 | -4.470935 | h |
| C-CT | -3.807756 | 5.271006  | -6.873998 | h |
| C-CT | -5.446438 | 3.720437  | -5.849198 | h |
| C-CT | -5.526865 | 6.119871  | -5.261817 | h |
| H-HC | -6.408724 | 6.048696  | -5.898370 | h |
| H-HC | -5.842879 | 5.930444  | -4.233082 | h |
| C-CT | -4.902528 | 7.505774  | -5.342690 | h |
| H-HC | -3.991017 | 7.576772  | -4.743909 | h |
| H-HC | -4.696279 | 7.840076  | -6.357059 | h |
| H-HC | -5.609322 | 8.200334  | -4.883764 | h |
| C-CT | -4.638732 | 5.566470  | -8.114807 | h |
| H-HC | -3.171997 | 6.118492  | -6.609626 | h |
| H-HC | -3.156442 | 4.410652  | -7.030597 | h |
| H-HC | -3.958311 | 5.930121  | -8.886255 | h |
| H-HC | -5.131018 | 4.676117  | -8.505819 | h |

|      |           |          |           |   |
|------|-----------|----------|-----------|---|
| H-HC | -5.388688 | 6.342095 | -7.946377 | h |
| C-CT | -6.322373 | 3.319020 | -4.670093 | h |
| H-HC | -6.069832 | 3.935557 | -6.716928 | h |
| H-HC | -4.742486 | 2.928827 | -6.108299 | h |
| H-HC | -7.096193 | 4.059872 | -4.454946 | h |
| H-HC | -6.825453 | 2.386186 | -4.930429 | h |
| H-HC | -5.761656 | 3.132514 | -3.751269 | h |

## **2/h-Telo**

|      |           |            |          |   |
|------|-----------|------------|----------|---|
| O-OH | -3.838968 | -6.544454  | 8.936434 | 1 |
| H-HO | -3.096848 | -6.027865  | 8.584722 | 1 |
| C-CT | -4.309094 | -7.350844  | 7.863090 | 1 |
| H-H1 | -4.850004 | -6.752828  | 7.124902 | 1 |
| H-H1 | -4.989522 | -8.134472  | 8.211116 | 1 |
| C-CT | -3.097496 | -7.985820  | 7.182536 | 1 |
| H-H1 | -3.429206 | -8.533779  | 6.297336 | 1 |
| O-OS | -2.172239 | -6.969399  | 6.814471 | 1 |
| C-CT | -0.899805 | -7.568806  | 6.779581 | 1 |
| H-H2 | -0.821991 | -8.225720  | 5.905366 | 1 |
| N-N* | 0.216675  | -6.593203  | 6.791122 | 1 |
| C-CK | 1.545432  | -6.866209  | 6.562672 | 1 |
| H-H5 | 1.922622  | -7.859370  | 6.351003 | 1 |
| N-NB | 2.326382  | -5.824234  | 6.603052 | 1 |
| C-CB | 1.458627  | -4.770041  | 6.878520 | 1 |
| C-CA | 1.648466  | -3.371423  | 7.028506 | 1 |
| N-N2 | 2.828816  | -2.752602  | 6.909918 | 1 |
| H-H  | 3.662434  | -3.287648  | 6.712985 | 1 |
| H-H  | 2.868315  | -1.750176  | 7.020967 | 1 |
| N-NC | 0.582924  | -2.596186  | 7.304106 | 1 |
| C-CQ | -0.610893 | -3.171148  | 7.439478 | 1 |
| H-H5 | -1.433102 | -2.503468  | 7.661453 | 1 |
| N-NC | -0.921207 | -4.461867  | 7.329147 | 1 |
| C-CB | 0.168438  | -5.228333  | 7.025013 | 1 |
| C-CT | -2.332090 | -8.960405  | 8.083673 | 1 |
| H-H1 | -2.726102 | -8.957275  | 9.106789 | 1 |
| C-CT | -0.914220 | -8.395819  | 8.054861 | 1 |
| H-HC | -0.772086 | -7.735205  | 8.909989 | 1 |
| H-HC | -0.162975 | -9.184342  | 8.040827 | 1 |
| O-OS | -2.332794 | -10.257222 | 7.510758 | 1 |
| P-P  | -3.501243 | -11.318964 | 7.855579 | 1 |
| O-O2 | -3.724799 | -11.297509 | 9.315207 | 1 |
| O-O2 | -3.191969 | -12.586507 | 7.162034 | 1 |
| O-OS | -4.779820 | -10.645607 | 7.139129 | 1 |
| C-CT | -5.070640 | -10.885990 | 5.771291 | 1 |
| H-H1 | -5.420064 | -11.913184 | 5.653405 | 1 |
| H-H1 | -4.164252 | -10.750646 | 5.180168 | 1 |
| C-CT | -6.147278 | -9.906558  | 5.281169 | 1 |
| H-H1 | -7.021441 | -9.970279  | 5.934719 | 1 |
| O-OS | -5.572683 | -8.602047  | 5.307512 | 1 |
| C-CT | -5.418659 | -8.127252  | 3.986308 | 1 |
| H-H2 | -6.245163 | -7.438505  | 3.749648 | 1 |
| N-N* | -4.113979 | -7.439635  | 3.918255 | 1 |
| C-CK | -2.914015 | -7.857009  | 3.391533 | 1 |
| H-H5 | -2.740963 | -8.835028  | 2.963629 | 1 |
| N-NB | -1.969981 | -6.964543  | 3.452590 | 1 |
| C-CB | -2.583558 | -5.860547  | 4.038167 | 1 |

|      |            |            |           |   |
|------|------------|------------|-----------|---|
| C-C  | -2.090290  | -4.542182  | 4.298355  | 1 |
| O-O  | -0.976031  | -4.078596  | 4.047759  | 1 |
| N-NA | -3.041144  | -3.708680  | 4.875518  | 1 |
| H-H  | -2.734731  | -2.770243  | 5.087758  | 1 |
| C-CA | -4.321878  | -4.111791  | 5.175146  | 1 |
| N-N2 | -5.125455  | -3.214598  | 5.718492  | 1 |
| H-H  | -4.819753  | -2.262984  | 5.863857  | 1 |
| H-H  | -6.077934  | -3.480002  | 5.917227  | 1 |
| N-NC | -4.805576  | -5.331379  | 4.923312  | 1 |
| C-CB | -3.887903  | -6.155382  | 4.351452  | 1 |
| C-CT | -6.564800  | -10.161175 | 3.823472  | 1 |
| H-H1 | -6.523019  | -11.221199 | 3.561461  | 1 |
| C-CT | -5.504251  | -9.351885  | 3.087331  | 1 |
| H-HC | -4.575662  | -9.917502  | 3.076041  | 1 |
| H-HC | -5.790965  | -9.075718  | 2.074521  | 1 |
| O-OS | -7.875861  | -9.657011  | 3.621074  | 1 |
| P-P  | -8.581702  | -9.600342  | 2.169496  | 1 |
| O-O2 | -10.020298 | -9.890065  | 2.339733  | 1 |
| O-O2 | -7.772454  | -10.367831 | 1.199161  | 1 |
| O-OS | -8.402667  | -8.025275  | 1.867525  | 1 |
| C-CT | -9.340738  | -7.106035  | 2.410635  | 1 |
| H-H1 | -9.362557  | -7.204671  | 3.497611  | 1 |
| H-H1 | -10.331622 | -7.355974  | 2.024995  | 1 |
| C-CT | -9.063953  | -5.640751  | 2.065242  | 1 |
| H-H1 | -9.965897  | -5.064779  | 2.290234  | 1 |
| O-OS | -7.961580  | -5.099714  | 2.778808  | 1 |
| C-CT | -7.617812  | -3.871169  | 2.149712  | 1 |
| H-H2 | -7.952778  | -3.009242  | 2.747313  | 1 |
| N-N* | -6.163755  | -3.800140  | 1.925761  | 1 |
| C-CK | -5.249508  | -4.810348  | 1.768178  | 1 |
| H-H5 | -5.528765  | -5.855709  | 1.805598  | 1 |
| N-NB | -4.022231  | -4.394110  | 1.595801  | 1 |
| C-CB | -4.138887  | -3.001992  | 1.634674  | 1 |
| C-C  | -3.153104  | -1.967756  | 1.525110  | 1 |
| O-O  | -1.934617  | -2.079958  | 1.409158  | 1 |
| N-NA | -3.694389  | -0.688736  | 1.539691  | 1 |
| H-H  | -3.064314  | 0.097257   | 1.482725  | 1 |
| C-CA | -5.038805  | -0.435121  | 1.632652  | 1 |
| N-N2 | -5.389087  | 0.830412   | 1.495736  | 1 |
| H-H  | -4.671844  | 1.527470   | 1.356143  | 1 |
| H-H  | -6.362715  | 1.100634   | 1.459999  | 1 |
| N-NC | -5.973649  | -1.377765  | 1.775479  | 1 |
| C-CB | -5.454916  | -2.636699  | 1.784083  | 1 |
| C-CT | -8.652081  | -5.370264  | 0.629114  | 1 |
| H-H1 | -7.765944  | -5.974385  | 0.415768  | 1 |
| C-CT | -8.299115  | -3.897730  | 0.783697  | 1 |
| H-HC | -7.652640  | -3.555046  | -0.020024 | 1 |
| H-HC | -9.205748  | -3.296165  | 0.811291  | 1 |
| O-OS | -9.650161  | -5.566533  | -0.347424 | 1 |
| P-P  | -9.253311  | -5.555290  | -1.901031 | 1 |
| O-O2 | -10.306692 | -6.217743  | -2.690734 | 1 |
| O-O2 | -7.844067  | -5.980019  | -2.024715 | 1 |
| O-OS | -9.272258  | -4.004153  | -2.261104 | 1 |
| C-CT | -10.430175 | -3.216431  | -2.021267 | 1 |
| H-H1 | -10.724635 | -3.289273  | -0.973936 | 1 |
| H-H1 | -11.262134 | -3.609670  | -2.598130 | 1 |
| C-CT | -10.216827 | -1.730169  | -2.352876 | 1 |
| H-H1 | -11.163872 | -1.206177  | -2.210222 | 1 |

|      |            |           |           |   |     |
|------|------------|-----------|-----------|---|-----|
| O-OS | -9.233363  | -1.184600 | -1.473459 | l |     |
| C-CT | -8.460889  | -0.199217 | -2.134348 | l | H-H |
| H-H2 | -8.525513  | 0.778038  | -1.633600 | l |     |
| N-N* | -7.078485  | -0.711027 | -2.122354 | h |     |
| C-CK | -6.703725  | -2.028250 | -2.218956 | h |     |
| H-H5 | -7.431345  | -2.818825 | -2.313151 | h |     |
| N-NB | -5.408248  | -2.193750 | -2.154827 | h |     |
| C-CB | -4.911483  | -0.925982 | -2.008622 | h |     |
| C-C  | -3.538788  | -0.543085 | -1.828912 | h |     |
| O-O  | -2.586227  | -1.295317 | -1.755224 | h |     |
| N-NA | -3.438535  | 0.859744  | -1.692130 | h |     |
| H-H  | -2.482723  | 1.236111  | -1.607079 | h |     |
| C-CA | -4.512222  | 1.713576  | -1.686867 | h |     |
| N-N2 | -4.231748  | 3.044796  | -1.586580 | h |     |
| H-H  | -3.281117  | 3.345364  | -1.347084 | h |     |
| H-H  | -5.004982  | 3.619669  | -1.263247 | h |     |
| N-NC | -5.776602  | 1.355428  | -1.829394 | h |     |
| C-CB | -5.916703  | 0.017139  | -1.975722 | h |     |
| C-CT | -9.743951  | -1.433011 | -3.778650 | l |     |
| H-H1 | -9.073420  | -2.222466 | -4.105224 | l |     |
| C-CT | -8.994613  | -0.124156 | -3.562027 | l |     |
| H-HC | -8.206568  | 0.018743  | -4.300515 | l |     |
| H-HC | -9.711126  | 0.697206  | -3.620350 | l |     |
| O-OS | -10.745193 | -1.162140 | -4.746312 | l |     |
| P-P  | -11.926797 | -2.193456 | -5.089030 | l |     |
| O-O2 | -11.368410 | -3.561994 | -5.080155 | l |     |
| O-O2 | -12.689351 | -1.692495 | -6.248344 | l |     |
| O-OS | -12.797247 | -1.965640 | -3.761290 | l |     |
| C-CT | -13.760883 | -2.894161 | -3.290753 | l |     |
| H-H1 | -13.356738 | -3.907660 | -3.290155 | l |     |
| H-H1 | -14.637431 | -2.874591 | -3.941212 | l |     |
| C-CT | -14.162407 | -2.516929 | -1.854157 | l |     |
| H-H1 | -15.008021 | -3.138696 | -1.547344 | l |     |
| O-OS | -13.086656 | -2.680293 | -0.930744 | l |     |
| C-CT | -13.474533 | -1.995471 | 0.244216  | l |     |
| H-H2 | -14.277212 | -2.560654 | 0.741168  | l |     |
| N-N* | -12.334658 | -1.788693 | 1.184123  | l |     |
| C-CM | -11.247868 | -0.995895 | 0.866965  | l |     |
| H-H4 | -11.186100 | -0.526373 | -0.101426 | l |     |
| C-CM | -10.247236 | -0.763009 | 1.755475  | l |     |
| C-CT | -9.092975  | 0.144618  | 1.362480  | l |     |
| H-HC | -8.374662  | -0.418628 | 0.768178  | l |     |
| H-HC | -9.453080  | 0.994240  | 0.779926  | l |     |
| H-HC | -8.587637  | 0.513100  | 2.253085  | l |     |
| C-C  | -10.277229 | -1.384466 | 3.072128  | l |     |
| O-O  | -9.409481  | -1.294690 | 3.934268  | l |     |
| N-NA | -11.403300 | -2.134800 | 3.327474  | l |     |
| H-H  | -11.485539 | -2.543264 | 4.240846  | l |     |
| C-C  | -12.458086 | -2.327300 | 2.464435  | l |     |
| O-O  | -13.462845 | -2.906066 | 2.855997  | l |     |
| C-CT | -14.560172 | -1.048905 | -1.691371 | l |     |
| H-H1 | -14.037692 | -0.437706 | -2.425623 | l |     |
| C-CT | -14.047480 | -0.693873 | -0.302459 | l |     |
| H-HC | -13.288174 | 0.075453  | -0.378169 | l |     |
| H-HC | -14.855224 | -0.334064 | 0.317745  | l |     |
| O-OS | -15.959013 | -0.843408 | -1.709640 | l |     |
| P-P  | -16.710631 | -0.276259 | -3.013438 | l |     |
| O-O2 | -18.145124 | -0.117679 | -2.702303 | l |     |

|      |            |           |           |   |
|------|------------|-----------|-----------|---|
| O-O2 | -16.274070 | -1.048275 | -4.193899 | 1 |
| O-OS | -16.053381 | 1.188495  | -3.072267 | 1 |
| C-CT | -15.049348 | 1.556071  | -4.015063 | 1 |
| H-H1 | -15.502877 | 1.729066  | -4.992911 | 1 |
| H-H1 | -14.306624 | 0.764101  | -4.124826 | 1 |
| C-CT | -14.348398 | 2.840377  | -3.547855 | 1 |
| H-H1 | -13.464170 | 3.017252  | -4.164693 | 1 |
| O-OS | -15.265683 | 3.918572  | -3.684455 | 1 |
| C-CT | -15.461684 | 4.546449  | -2.427209 | 1 |
| H-H2 | -14.854297 | 5.459692  | -2.365476 | 1 |
| N-N* | -16.902881 | 4.837367  | -2.243157 | 1 |
| C-CM | -17.868464 | 3.981614  | -2.731363 | 1 |
| H-H4 | -17.566184 | 3.118666  | -3.311519 | 1 |
| C-CM | -19.186555 | 4.187971  | -2.484298 | 1 |
| C-CT | -20.200841 | 3.182683  | -3.014166 | 1 |
| H-HC | -20.208050 | 3.200965  | -4.104099 | 1 |
| H-HC | -19.948225 | 2.178762  | -2.666032 | 1 |
| H-HC | -21.200336 | 3.434916  | -2.652868 | 1 |
| C-C  | -19.608119 | 5.345563  | -1.698751 | 1 |
| O-O  | -20.759624 | 5.631757  | -1.393754 | 1 |
| N-NA | -18.581543 | 6.153100  | -1.254815 | 1 |
| H-H  | -18.832139 | 6.962910  | -0.716920 | 1 |
| C-C  | -17.240574 | 5.949152  | -1.481096 | 1 |
| O-O  | -16.405873 | 6.704951  | -1.000113 | 1 |
| C-CT | -13.924574 | 2.768907  | -2.075727 | 1 |
| H-H1 | -13.923037 | 1.740324  | -1.720340 | 1 |
| C-CT | -15.015072 | 3.547292  | -1.369532 | 1 |
| H-HC | -15.826647 | 2.864218  | -1.131391 | 1 |
| H-HC | -14.663286 | 4.034973  | -0.463100 | 1 |
| O-OS | -12.664188 | 3.377812  | -1.874910 | 1 |
| P-P  | -11.446583 | 2.524677  | -1.265102 | 1 |
| O-O2 | -10.202100 | 3.309844  | -1.358469 | 1 |
| O-O2 | -11.514249 | 1.171899  | -1.848466 | 1 |
| O-OS | -11.896354 | 2.427222  | 0.275106  | 1 |
| C-CT | -12.040012 | 3.609424  | 1.055832  | 1 |
| H-H1 | -12.505083 | 4.388829  | 0.451241  | 1 |
| H-H1 | -11.056312 | 3.976200  | 1.359836  | 1 |
| C-CT | -12.927029 | 3.385545  | 2.291861  | 1 |
| H-H1 | -13.083173 | 4.350904  | 2.769602  | 1 |
| O-OS | -14.196342 | 2.854693  | 1.911645  | 1 |
| C-CT | -14.559309 | 1.907658  | 2.897469  | 1 |
| H-H2 | -14.856945 | 2.416117  | 3.824621  | 1 |
| N-N* | -15.642431 | 1.009635  | 2.435452  | 1 |
| C-CK | -15.833619 | -0.327528 | 2.715291  | 1 |
| H-H5 | -15.157718 | -0.927289 | 3.316640  | 1 |
| N-NB | -16.879170 | -0.846093 | 2.132609  | 1 |
| C-CB | -17.475963 | 0.235696  | 1.484829  | 1 |
| C-CA | -18.650553 | 0.381906  | 0.701559  | 1 |
| N-N2 | -19.465124 | -0.625691 | 0.372661  | 1 |
| H-H  | -19.247947 | -1.566645 | 0.665550  | 1 |
| H-H  | -20.266077 | -0.437362 | -0.209996 | 1 |
| N-NC | -18.995775 | 1.610389  | 0.266509  | 1 |
| C-CQ | -18.217737 | 2.644732  | 0.582703  | 1 |
| H-H5 | -18.547640 | 3.613419  | 0.232629  | 1 |
| N-NC | -17.084217 | 2.639539  | 1.281484  | 1 |
| C-CB | -16.754848 | 1.385045  | 1.707562  | 1 |
| C-CT | -12.323161 | 2.394975  | 3.305485  | 1 |
| H-H1 | -11.277037 | 2.165209  | 3.086605  | 1 |

|      |            |           |          |   |
|------|------------|-----------|----------|---|
| C-CT | -13.230811 | 1.193147  | 3.093567 | 1 |
| H-HC | -12.960836 | 0.679197  | 2.176068 | 1 |
| H-HC | -13.234864 | 0.524469  | 3.953637 | 1 |
| O-OS | -12.512152 | 2.733362  | 4.674682 | 1 |
| P-P  | -11.870064 | 4.028818  | 5.391177 | 1 |
| O-O2 | -11.932754 | 3.817977  | 6.851754 | 1 |
| O-O2 | -12.450059 | 5.249277  | 4.797191 | 1 |
| O-OS | -10.336567 | 3.935076  | 4.932420 | 1 |
| C-CT | -9.419385  | 3.053969  | 5.554598 | 1 |
| H-H1 | -9.549405  | 2.030398  | 5.201689 | 1 |
| H-H1 | -9.546846  | 3.068016  | 6.639388 | 1 |
| C-CT | -8.013946  | 3.559187  | 5.249687 | 1 |
| H-H1 | -7.971146  | 4.625817  | 5.485423 | 1 |
| O-OS | -7.063537  | 2.839344  | 6.014249 | 1 |
| C-CT | -5.788365  | 3.089527  | 5.456901 | 1 |
| H-H2 | -5.255833  | 3.876912  | 6.005033 | 1 |
| N-N* | -5.012330  | 1.843017  | 5.455349 | 1 |
| C-CK | -5.478545  | 0.554529  | 5.497115 | 1 |
| H-H5 | -6.532083  | 0.317217  | 5.600410 | 1 |
| N-NB | -4.539056  | -0.343606 | 5.396686 | 1 |
| C-CB | -3.367091  | 0.402185  | 5.281409 | 1 |
| C-C  | -2.004686  | -0.013125 | 5.141241 | 1 |
| O-O  | -1.559205  | -1.155587 | 5.075994 | 1 |
| N-NA | -1.108937  | 1.043895  | 5.064591 | 1 |
| H-H  | -0.126674  | 0.804224  | 5.067959 | 1 |
| C-CA | -1.490571  | 2.363102  | 5.091380 | 1 |
| N-N2 | -0.518537  | 3.256756  | 4.991603 | 1 |
| H-H  | 0.450404   | 2.978653  | 4.902576 | 1 |
| H-H  | -0.761849  | 4.234126  | 5.017142 | 1 |
| N-NC | -2.760482  | 2.775475  | 5.212375 | 1 |
| C-CB | -3.648351  | 1.745710  | 5.312783 | 1 |
| C-CT | -7.545811  | 3.356354  | 3.813697 | 1 |
| H-H1 | -7.785024  | 2.340290  | 3.496692 | 1 |
| C-CT | -6.046163  | 3.505386  | 4.015442 | 1 |
| H-HC | -5.523608  | 2.860955  | 3.317597 | 1 |
| H-HC | -5.740920  | 4.541586  | 3.886523 | 1 |
| O-OS | -8.054221  | 4.320862  | 2.910811 | 1 |
| P-P  | -7.694800  | 4.302225  | 1.339888 | 1 |
| O-O2 | -8.675027  | 5.149184  | 0.632809 | 1 |
| O-O2 | -7.473117  | 2.900321  | 0.927283 | 1 |
| O-OS | -6.273772  | 5.057345  | 1.337098 | 1 |
| C-CT | -6.177469  | 6.415148  | 1.751174 | 1 |
| H-H1 | -6.687718  | 6.542700  | 2.706909 | 1 |
| H-H1 | -6.669447  | 7.053981  | 1.013545 | 1 |
| C-CT | -4.721862  | 6.873884  | 1.919754 | 1 |
| H-H1 | -4.725219  | 7.911989  | 2.261702 | 1 |
| O-OS | -3.982301  | 6.085465  | 2.851438 | 1 |
| C-CT | -2.631863  | 5.973407  | 2.409231 | 1 |
| H-H2 | -1.925868  | 6.258444  | 3.199072 | 1 |
| N-N* | -2.402108  | 4.570700  | 1.985533 | 1 |
| C-CK | -3.332816  | 3.582246  | 1.807297 | 1 |
| H-H5 | -4.390593  | 3.790820  | 1.850793 | 1 |
| N-NB | -2.834555  | 2.393520  | 1.611396 | 1 |
| C-CB | -1.459890  | 2.614066  | 1.607104 | 1 |
| C-C  | -0.372241  | 1.698377  | 1.428939 | 1 |
| O-O  | -0.408942  | 0.470368  | 1.349500 | 1 |
| N-NA | 0.855737   | 2.334787  | 1.312799 | 1 |
| H-H  | 1.664456   | 1.763194  | 1.122161 | 1 |

|      |           |           |           |       |
|------|-----------|-----------|-----------|-------|
| C-CA | 1.017683  | 3.690964  | 1.447244  | l     |
| N-N2 | 2.236605  | 4.145140  | 1.235038  | l     |
| H-H  | 2.983646  | 3.529703  | 0.952557  | l     |
| H-H  | 2.396265  | 5.137026  | 1.395638  | l     |
| N-NC | 0.030704  | 4.552785  | 1.724557  | l     |
| C-CB | -1.189533 | 3.954232  | 1.773137  | l     |
| C-CT | -3.924354 | 6.819579  | 0.628734  | l     |
| H-H1 | -4.100226 | 5.854828  | 0.146906  | l     |
| C-CT | -2.526715 | 6.914130  | 1.219043  | l     |
| H-HC | -1.737042 | 6.625808  | 0.533104  | l     |
| H-HC | -2.353750 | 7.927688  | 1.573194  | l     |
| O-OS | -4.222453 | 7.918676  | -0.205025 | l     |
| P-P  | -4.123951 | 7.796713  | -1.797390 | l     |
| O-O2 | -4.798099 | 8.952085  | -2.416913 | l     |
| O-O2 | -4.508610 | 6.421275  | -2.164083 | l     |
| O-OS | -2.558970 | 7.926478  | -2.081460 | l     |
| C-CT | -1.813007 | 9.011221  | -1.548739 | l     |
| H-H1 | -2.038676 | 9.138138  | -0.488837 | l     |
| H-H1 | -2.093414 | 9.938697  | -2.047568 | l     |
| C-CT | -0.301505 | 8.782609  | -1.670199 | l     |
| H-H1 | 0.181827  | 9.573238  | -1.106648 | l     |
| O-OS | 0.059119  | 7.511032  | -1.126255 | l     |
| C-CT | 0.701415  | 6.726949  | -2.118333 | l H-H |
| H-H2 | 1.787380  | 6.714640  | -1.960200 | l     |
| N-N* | 0.121350  | 5.371519  | -2.040329 | h     |
| C-CK | -1.166579 | 5.066049  | -1.659431 | h     |
| H-H5 | -1.900792 | 5.838250  | -1.480648 | h     |
| N-NB | -1.375599 | 3.779141  | -1.561501 | h     |
| C-CB | -0.175600 | 3.214576  | -1.919881 | h     |
| C-C  | 0.169402  | 1.824973  | -1.994154 | h     |
| O-O  | -0.540815 | 0.867922  | -1.718609 | h     |
| N-NA | 1.485284  | 1.657076  | -2.457522 | h     |
| H-H  | 1.790355  | 0.693834  | -2.636328 | h     |
| C-CA | 2.306041  | 2.690980  | -2.850186 | h     |
| N-N2 | 3.449104  | 2.318080  | -3.484912 | h     |
| H-H  | 3.800692  | 1.363803  | -3.366337 | h     |
| H-H  | 4.140296  | 3.048850  | -3.621104 | h     |
| N-NC | 2.019770  | 3.970727  | -2.713939 | h     |
| C-CB | 0.768882  | 4.174160  | -2.236186 | h     |
| C-CT | 0.225767  | 8.849867  | -3.102386 | l     |
| H-H1 | -0.474038 | 9.350503  | -3.775146 | l     |
| C-CT | 0.358829  | 7.378740  | -3.454272 | l     |
| H-HC | -0.606226 | 7.024110  | -3.810659 | l     |
| H-HC | 1.141817  | 7.214390  | -4.194410 | l     |
| O-OS | 1.501492  | 9.465200  | -3.140635 | l     |
| P-P  | 1.665697  | 11.065120 | -3.263682 | l     |
| O-O2 | 0.674804  | 11.552970 | -4.245551 | l     |
| O-O2 | 3.094252  | 11.384866 | -3.439878 | l     |
| O-OS | 1.225693  | 11.594597 | -1.803319 | l     |
| C-CT | 0.050008  | 12.382519 | -1.632235 | l     |
| H-H1 | -0.783038 | 11.922691 | -2.163390 | l     |
| H-H1 | 0.204522  | 13.361838 | -2.080337 | l     |
| C-CT | -0.369951 | 12.531645 | -0.162353 | l     |
| H-H1 | -1.167321 | 13.276832 | -0.098202 | l     |
| O-OS | -0.869440 | 11.266993 | 0.277076  | l     |
| C-CT | -0.604192 | 11.085823 | 1.658570  | l     |
| H-H2 | -1.541469 | 10.957104 | 2.217896  | l     |
| N-N* | 0.264064  | 9.890897  | 1.845222  | l     |



|      |           |           |           |   |
|------|-----------|-----------|-----------|---|
| C-CM | 1.399017  | 9.688957  | 1.088935  | 1 |
| H-H4 | 1.651213  | 10.376614 | 0.299071  | 1 |
| C-CM | 2.206221  | 8.618186  | 1.280924  | 1 |
| C-CT | 3.424764  | 8.455413  | 0.388239  | 1 |
| H-HC | 3.127516  | 8.032485  | -0.571748 | 1 |
| H-HC | 3.904114  | 9.415203  | 0.206862  | 1 |
| H-HC | 4.140208  | 7.779903  | 0.852964  | 1 |
| C-C  | 1.899537  | 7.651376  | 2.328256  | 1 |
| O-O  | 2.568009  | 6.667802  | 2.631995  | 1 |
| N-NA | 0.747695  | 7.907572  | 3.033805  | 1 |
| H-H  | 0.515750  | 7.267182  | 3.768399  | 1 |
| C-C  | -0.096266 | 8.974728  | 2.832897  | 1 |
| O-O  | -1.120897 | 9.069873  | 3.497683  | 1 |
| C-CT | 0.718644  | 12.934732 | 0.840633  | 1 |
| H-H1 | 1.656309  | 12.432497 | 0.600833  | 1 |
| C-CT | 0.095029  | 12.363689 | 2.109573  | 1 |
| H-HC | 0.831513  | 12.170822 | 2.885995  | 1 |
| H-HC | -0.652504 | 13.062170 | 2.485003  | 1 |
| O-OS | 0.929478  | 14.320152 | 1.057283  | 1 |
| P-P  | 1.614120  | 15.266853 | -0.050333 | 1 |
| O-O2 | 2.206734  | 16.432697 | 0.634010  | 1 |
| O-O2 | 0.657029  | 15.462964 | -1.156293 | 1 |
| O-OS | 2.824706  | 14.347382 | -0.572886 | 1 |
| C-CT | 3.279299  | 14.407962 | -1.921366 | 1 |
| H-H1 | 3.224647  | 15.438049 | -2.280861 | 1 |
| H-H1 | 2.636242  | 13.795292 | -2.552462 | 1 |
| C-CT | 4.740793  | 13.949014 | -2.063668 | 1 |
| H-H1 | 4.976977  | 13.827283 | -3.124620 | 1 |
| O-OS | 5.543218  | 14.978461 | -1.491148 | 1 |
| C-CT | 6.396039  | 14.390473 | -0.528265 | 1 |
| H-H2 | 7.323602  | 14.047859 | -1.008902 | 1 |
| N-N* | 6.680690  | 15.321000 | 0.579387  | 1 |
| C-CM | 5.768605  | 16.281904 | 0.958227  | 1 |
| H-H4 | 4.841823  | 16.378801 | 0.403558  | 1 |
| C-CM | 6.011486  | 17.099776 | 2.013724  | 1 |
| C-CT | 4.969309  | 18.139615 | 2.403652  | 1 |
| H-HC | 5.052007  | 19.006954 | 1.748645  | 1 |
| H-HC | 3.966338  | 17.717304 | 2.328094  | 1 |
| H-HC | 5.136113  | 18.458709 | 3.434475  | 1 |
| C-C  | 7.252023  | 16.958884 | 2.774179  | 1 |
| O-O  | 7.561232  | 17.592402 | 3.777402  | 1 |
| N-NA | 8.116317  | 15.988200 | 2.313513  | 1 |
| H-H  | 8.982932  | 15.865924 | 2.803922  | 1 |
| C-C  | 7.889094  | 15.154642 | 1.245717  | 1 |
| O-O  | 8.720691  | 14.314867 | 0.917657  | 1 |
| C-CT | 5.096732  | 12.643853 | -1.332025 | 1 |
| H-H1 | 4.225280  | 11.989597 | -1.225909 | 1 |
| C-CT | 5.605145  | 13.202905 | -0.013776 | 1 |
| H-HC | 4.784067  | 13.541199 | 0.610413  | 1 |
| H-HC | 6.232094  | 12.512290 | 0.534064  | 1 |
| O-OS | 6.181851  | 12.011762 | -2.003051 | 1 |
| P-P  | 6.501427  | 10.435345 | -1.857702 | 1 |
| O-O2 | 7.653494  | 10.112499 | -2.724415 | 1 |
| O-O2 | 5.232475  | 9.692845  | -1.993173 | 1 |
| O-OS | 6.983339  | 10.324872 | -0.322591 | 1 |
| C-CT | 8.294698  | 10.693923 | 0.103866  | 1 |
| H-H1 | 8.502461  | 11.735342 | -0.153366 | 1 |
| H-H1 | 9.032513  | 10.060859 | -0.393546 | 1 |

|      |           |           |          |   |
|------|-----------|-----------|----------|---|
| C-CT | 8.436657  | 10.533818 | 1.628501 | 1 |
| H-H1 | 9.482211  | 10.678025 | 1.914260 | 1 |
| O-OS | 7.618529  | 11.510700 | 2.262434 | 1 |
| C-CT | 6.736565  | 10.878883 | 3.166931 | 1 |
| H-H2 | 7.197739  | 10.837186 | 4.161538 | 1 |
| N-N* | 5.490376  | 11.676427 | 3.186463 | 1 |
| C-CK | 4.247709  | 11.367665 | 2.687748 | 1 |
| H-H5 | 3.996577  | 10.413509 | 2.252979 | 1 |
| N-NB | 3.395979  | 12.349336 | 2.728512 | 1 |
| C-CB | 4.090967  | 13.363589 | 3.383459 | 1 |
| C-CA | 3.746327  | 14.677736 | 3.787680 | 1 |
| N-N2 | 2.580792  | 15.269274 | 3.508828 | 1 |
| H-H  | 1.923201  | 14.826015 | 2.874634 | 1 |
| H-H  | 2.405059  | 16.204257 | 3.840600 | 1 |
| N-NC | 4.647584  | 15.397589 | 4.482934 | 1 |
| C-CQ | 5.842013  | 14.861336 | 4.743206 | 1 |
| H-H5 | 6.533274  | 15.492124 | 5.291365 | 1 |
| N-NC | 6.300961  | 13.659399 | 4.390111 | 1 |
| C-CB | 5.360837  | 12.945913 | 3.705826 | 1 |
| C-CT | 7.956283  | 9.161073  | 2.120374 | 1 |
| H-H1 | 7.947523  | 8.431751  | 1.303648 | 1 |
| C-CT | 6.553494  | 9.469179  | 2.613973 | 1 |
| H-HC | 5.884160  | 9.472878  | 1.758696 | 1 |
| H-HC | 6.217876  | 8.771912  | 3.380446 | 1 |
| O-OS | 8.699670  | 8.692122  | 3.230077 | 1 |
| P-P  | 10.025154 | 7.807368  | 3.019979 | 1 |
| O-O2 | 10.677062 | 7.596823  | 4.327963 | 1 |
| O-O2 | 10.775365 | 8.353650  | 1.870256 | 1 |
| O-OS | 9.309831  | 6.441200  | 2.569841 | 1 |
| C-CT | 8.607207  | 5.633172  | 3.503017 | 1 |
| H-H1 | 8.040146  | 6.250220  | 4.202537 | 1 |
| H-H1 | 9.300220  | 5.012766  | 4.073707 | 1 |
| C-CT | 7.637314  | 4.748069  | 2.726530 | 1 |
| H-H1 | 8.202564  | 4.126929  | 2.021739 | 1 |
| O-OS | 6.865790  | 3.942977  | 3.617293 | 1 |
| C-CT | 5.618591  | 3.812403  | 2.976029 | 1 |
| H-H2 | 5.762351  | 3.229657  | 2.058498 | 1 |
| N-N* | 4.565330  | 3.157749  | 3.769585 | 1 |
| C-CK | 3.365806  | 3.667297  | 4.214620 | 1 |
| H-H5 | 3.130157  | 4.726742  | 4.228647 | 1 |
| N-NB | 2.505461  | 2.757297  | 4.579961 | 1 |
| C-CB | 3.173738  | 1.554891  | 4.349727 | 1 |
| C-C  | 2.725017  | 0.199196  | 4.461857 | 1 |
| O-O  | 1.615612  | -0.210906 | 4.796630 | 1 |
| N-NA | 3.685522  | -0.734238 | 4.091163 | 1 |
| H-H  | 3.424936  | -1.707937 | 4.172122 | 1 |
| C-CA | 4.937858  | -0.394853 | 3.635265 | 1 |
| N-N2 | 5.743978  | -1.391727 | 3.303035 | 1 |
| H-H  | 5.451210  | -2.357257 | 3.372022 | 1 |
| H-H  | 6.664573  | -1.176340 | 2.941581 | 1 |
| N-NC | 5.360651  | 0.866047  | 3.485287 | 1 |
| C-CB | 4.439476  | 1.792995  | 3.871813 | 1 |
| C-CT | 6.619961  | 5.579179  | 1.924945 | 1 |
| H-H1 | 6.854298  | 6.642778  | 1.917503 | 1 |
| C-CT | 5.319852  | 5.255562  | 2.626044 | 1 |
| H-HC | 5.193685  | 5.854844  | 3.526658 | 1 |
| H-HC | 4.474821  | 5.341600  | 1.954459 | 1 |
| O-OS | 6.532858  | 5.036596  | 0.629217 | 1 |

|      |           |           |           |   |
|------|-----------|-----------|-----------|---|
| P-P  | 5.944047  | 5.820443  | -0.630971 | l |
| O-O2 | 6.545848  | 7.167336  | -0.657072 | l |
| O-O2 | 4.479331  | 5.630986  | -0.651884 | l |
| O-OS | 6.599237  | 4.906766  | -1.775343 | l |
| C-CT | 8.001776  | 4.671607  | -1.791298 | l |
| H-H1 | 8.505751  | 5.315650  | -1.067705 | l |
| H-H1 | 8.385207  | 4.907440  | -2.784871 | l |
| C-CT | 8.347109  | 3.209437  | -1.468392 | l |
| H-H1 | 9.434685  | 3.100707  | -1.520017 | l |
| O-OS | 7.900170  | 2.760096  | -0.183380 | l |
| C-CT | 7.569717  | 1.381170  | -0.249743 | l |
| H-H2 | 8.078908  | 0.798339  | 0.527540  | l |
| N-N* | 6.108440  | 1.173754  | -0.122311 | l |
| C-CK | 5.096497  | 2.101200  | -0.096550 | l |
| H-H5 | 5.283403  | 3.159121  | -0.246763 | l |
| N-NB | 3.917197  | 1.595054  | 0.153477  | l |
| C-CB | 4.156554  | 0.219337  | 0.243186  | l |
| C-C  | 3.264183  | -0.884900 | 0.457298  | l |
| O-O  | 2.054037  | -0.867533 | 0.666554  | l |
| N-NA | 3.886101  | -2.123764 | 0.381402  | l |
| H-H  | 3.321236  | -2.944654 | 0.532862  | l |
| C-CA | 5.228256  | -2.284043 | 0.154365  | l |
| N-N2 | 5.643922  | -3.536995 | 0.053822  | l |
| H-H  | 4.990869  | -4.297362 | 0.178949  | l |
| H-H  | 6.619695  | -3.707111 | -0.129162 | l |
| N-NC | 6.089210  | -1.270957 | -0.005992 | l |
| C-CB | 5.491559  | -0.046018 | 0.046087  | l |
| C-CT | 7.732299  | 2.228233  | -2.455032 | l |
| H-H1 | 6.662384  | 2.436060  | -2.540019 | l |
| C-CT | 8.009247  | 0.971256  | -1.643248 | l |
| H-HC | 7.469364  | 0.104096  | -1.975592 | l |
| H-HC | 9.070046  | 0.747884  | -1.655083 | l |
| O-OS | 8.383429  | 2.236866  | -3.712235 | l |
| P-P  | 7.688701  | 1.636415  | -5.039044 | l |
| O-O2 | 8.451816  | 2.065949  | -6.225535 | l |
| O-O2 | 6.231859  | 1.877635  | -4.954696 | l |
| O-OS | 7.898693  | 0.060753  | -4.866166 | l |
| C-CT | 9.170259  | -0.479590 | -4.541196 | l |
| H-H1 | 9.660288  | 0.141098  | -3.789659 | l |
| H-H1 | 9.816720  | -0.477404 | -5.417640 | l |
| C-CT | 9.055888  | -1.896059 | -3.957492 | l |
| H-H1 | 10.006838 | -2.119157 | -3.482158 | l |
| O-OS | 8.003986  | -1.961594 | -2.990308 | l |
| C-CT | 6.989516  | -2.847707 | -3.428428 | l |
| H-H2 | 7.032308  | -3.776186 | -2.847333 | l |
| N-N* | 5.660638  | -2.200909 | -3.311725 | h |
| C-CK | 5.372417  | -0.854028 | -3.291836 | h |
| H-H5 | 6.126865  | -0.104594 | -3.454250 | h |
| N-NB | 4.098511  | -0.604367 | -3.133138 | h |
| C-CB | 3.513377  | -1.848674 | -3.081450 | h |
| C-C  | 2.134092  | -2.199548 | -3.023760 | h |
| O-O  | 1.160891  | -1.434135 | -2.950304 | h |
| N-NA | 1.959287  | -3.581945 | -3.090240 | h |
| H-H  | 0.985591  | -3.911023 | -3.023769 | h |
| C-CA | 2.970010  | -4.484645 | -3.330945 | h |
| N-N2 | 2.588249  | -5.746159 | -3.629126 | h |
| H-H  | 1.628711  | -6.061246 | -3.453690 | h |
| H-H  | 3.332377  | -6.430961 | -3.646676 | h |

H-H

|      |           |           |           |   |
|------|-----------|-----------|-----------|---|
| N-NC | 4.251443  | -4.179260 | -3.345604 | h |
| C-CB | 4.459999  | -2.853827 | -3.219344 | h |
| C-CT | 8.788561  | -2.983289 | -4.997254 | l |
| H-H1 | 9.079959  | -2.676966 | -6.003703 | l |
| C-CT | 7.285340  | -3.138391 | -4.888443 | l |
| H-HC | 6.817084  | -2.371628 | -5.492523 | l |
| H-HC | 6.955608  | -4.134272 | -5.181677 | l |
| O-OS | 9.420302  | -4.194349 | -4.625178 | l |
| P-P  | 10.916376 | -4.548721 | -5.111794 | l |
| O-O2 | 10.972492 | -4.350023 | -6.575911 | l |
| O-O2 | 11.314495 | -5.841290 | -4.521235 | l |
| O-OS | 11.797774 | -3.394060 | -4.410023 | l |
| C-CT | 12.376753 | -2.347037 | -5.183343 | l |
| H-H1 | 11.609702 | -1.865045 | -5.787163 | l |
| H-H1 | 13.103919 | -2.769590 | -5.874997 | l |
| C-CT | 13.043827 | -1.271423 | -4.315178 | l |
| H-H1 | 13.627767 | -0.602577 | -4.952223 | l |
| O-OS | 12.030008 | -0.530315 | -3.642053 | l |
| C-CT | 12.551248 | 0.007644  | -2.435672 | l |
| H-H2 | 12.614679 | 1.102973  | -2.499848 | l |
| N-N* | 11.670645 | -0.388713 | -1.307548 | l |
| C-CM | 11.171945 | -1.669288 | -1.188453 | l |
| H-H4 | 11.437069 | -2.414380 | -1.923469 | l |
| C-CM | 10.314990 | -2.007926 | -0.192476 | l |
| C-CT | 9.744633  | -3.416691 | -0.165882 | l |
| H-HC | 8.853857  | -3.438146 | 0.461003  | l |
| H-HC | 9.468537  | -3.731495 | -1.174314 | l |
| H-HC | 10.487089 | -4.104578 | 0.235855  | l |
| C-C  | 9.937440  | -1.021539 | 0.816196  | l |
| O-O  | 9.155694  | -1.186459 | 1.748156  | l |
| N-NA | 10.521253 | 0.217778  | 0.659545  | l |
| H-H  | 10.313116 | 0.923070  | 1.343017  | l |
| C-C  | 11.347380 | 0.593424  | -0.374048 | l |
| O-O  | 11.722664 | 1.755974  | -0.463184 | l |
| C-CT | 13.953602 | -1.784906 | -3.200757 | l |
| H-H1 | 13.476841 | -2.633817 | -2.712698 | l |
| C-CT | 13.948123 | -0.582408 | -2.271370 | l |
| H-HC | 14.159484 | -0.867531 | -1.241755 | l |
| H-HC | 14.684707 | 0.144154  | -2.613916 | l |
| O-OS | 15.303209 | -2.049444 | -3.542105 | l |
| P-P  | 15.757872 | -3.423623 | -4.246460 | l |
| O-O2 | 17.172780 | -3.666616 | -3.903151 | l |
| O-O2 | 15.314778 | -3.436229 | -5.652884 | l |
| O-OS | 14.861399 | -4.453996 | -3.405081 | l |
| C-CT | 14.932815 | -5.856751 | -3.597517 | l |
| H-H1 | 15.954094 | -6.145985 | -3.858076 | l |
| H-H1 | 14.260718 | -6.152535 | -4.405473 | l |
| C-CT | 14.558680 | -6.584169 | -2.295796 | l |
| H-H1 | 14.524163 | -7.660258 | -2.485168 | l |
| O-OS | 15.583901 | -6.287376 | -1.351253 | l |
| C-CT | 14.989421 | -5.769710 | -0.176585 | l |
| H-H2 | 14.773517 | -6.592858 | 0.514523  | l |
| N-N* | 15.869629 | -4.756034 | 0.440939  | l |
| C-CM | 16.490098 | -3.800797 | -0.334035 | l |
| H-H4 | 16.427749 | -3.878633 | -1.412381 | l |
| C-CM | 17.168248 | -2.769687 | 0.228207  | l |
| C-CT | 17.820798 | -1.736553 | -0.680732 | l |
| H-HC | 18.721585 | -2.160088 | -1.127110 | l |

|      |           |            |           |   |
|------|-----------|------------|-----------|---|
| H-HC | 17.134494 | -1.440148  | -1.475248 | 1 |
| H-HC | 18.099361 | -0.853543  | -0.101804 | 1 |
| C-C  | 17.263554 | -2.668722  | 1.683554  | 1 |
| O-O  | 17.815578 | -1.772829  | 2.311599  | 1 |
| N-NA | 16.666867 | -3.699051  | 2.381297  | 1 |
| H-H  | 16.751671 | -3.684736  | 3.380893  | 1 |
| C-C  | 15.991878 | -4.761456  | 1.826731  | 1 |
| O-O  | 15.527484 | -5.645093  | 2.538662  | 1 |
| C-CT | 13.223270 | -6.152833  | -1.665899 | 1 |
| H-H1 | 12.539365 | -5.735095  | -2.410835 | 1 |
| C-CT | 13.694078 | -5.122500  | -0.650047 | 1 |
| H-HC | 13.891818 | -4.172544  | -1.136259 | 1 |
| H-HC | 12.994108 | -4.976457  | 0.163006  | 1 |
| O-OS | 12.664835 | -7.273060  | -0.993768 | 1 |
| P-P  | 11.138184 | -7.317214  | -0.469430 | 1 |
| O-O2 | 10.821881 | -8.708362  | -0.091428 | 1 |
| O-O2 | 10.281748 | -6.574853  | -1.416370 | 1 |
| O-OS | 11.218684 | -6.456061  | 0.881729  | 1 |
| C-CT | 11.998312 | -6.884759  | 1.990369  | 1 |
| H-H1 | 13.012015 | -7.129374  | 1.675591  | 1 |
| H-H1 | 11.555888 | -7.780960  | 2.429852  | 1 |
| C-CT | 12.074652 | -5.777823  | 3.047973  | 1 |
| H-H1 | 12.635476 | -6.153103  | 3.909377  | 1 |
| O-OS | 12.721893 | -4.611109  | 2.563904  | 1 |
| C-CT | 12.343251 | -3.577874  | 3.441380  | 1 |
| H-H2 | 12.804841 | -3.711311  | 4.427953  | 1 |
| N-N* | 12.728044 | -2.276844  | 2.863390  | 1 |
| C-CK | 13.525231 | -2.029510  | 1.773544  | 1 |
| H-H5 | 13.939144 | -2.821583  | 1.166265  | 1 |
| N-NB | 13.745628 | -0.764947  | 1.541410  | 1 |
| C-CB | 13.040837 | -0.118701  | 2.559472  | 1 |
| C-CA | 12.830176 | 1.243795   | 2.902591  | 1 |
| N-N2 | 13.323359 | 2.281338   | 2.218978  | 1 |
| H-H  | 13.841561 | 2.121585   | 1.367153  | 1 |
| H-H  | 13.113161 | 3.220228   | 2.521322  | 1 |
| N-NC | 12.062617 | 1.535761   | 3.971815  | 1 |
| C-CQ | 11.532617 | 0.536686   | 4.677874  | 1 |
| H-H5 | 10.927618 | 0.827178   | 5.527553  | 1 |
| N-NC | 11.652258 | -0.774297  | 4.468669  | 1 |
| C-CB | 12.422537 | -1.038172  | 3.374127  | 1 |
| C-CT | 10.691991 | -5.304686  | 3.516821  | 1 |
| H-H1 | 9.917797  | -5.605662  | 2.808047  | 1 |
| C-CT | 10.837446 | -3.782566  | 3.525470  | 1 |
| H-HC | 10.367053 | -3.357883  | 2.642769  | 1 |
| H-HC | 10.421738 | -3.334690  | 4.427574  | 1 |
| O-OS | 10.369629 | -5.739120  | 4.823301  | 1 |
| P-P  | 10.178172 | -7.298904  | 5.188120  | 1 |
| O-O2 | 9.459204  | -7.388935  | 6.474593  | 1 |
| O-O2 | 11.468192 | -7.995671  | 5.010520  | 1 |
| O-OS | 9.195183  | -7.817993  | 4.025946  | 1 |
| C-CT | 8.636117  | -9.121443  | 4.110288  | 1 |
| H-H1 | 8.191726  | -9.256688  | 5.099864  | 1 |
| H-H1 | 9.425621  | -9.863219  | 3.980480  | 1 |
| C-CT | 7.527824  | -9.366927  | 3.080208  | 1 |
| H-H1 | 7.223789  | -10.413809 | 3.148911  | 1 |
| O-OS | 6.426826  | -8.537395  | 3.424739  | 1 |
| C-CT | 6.023902  | -7.833300  | 2.272527  | 1 |
| H-H2 | 5.294873  | -8.435959  | 1.711791  | 1 |

|      |           |            |           |   |
|------|-----------|------------|-----------|---|
| N-N* | 5.424416  | -6.554895  | 2.702410  | 1 |
| C-CK | 6.008177  | -5.332044  | 2.934903  | 1 |
| H-H5 | 7.071829  | -5.149966  | 2.859375  | 1 |
| N-NB | 5.163096  | -4.393603  | 3.260611  | 1 |
| C-CB | 3.930193  | -5.046437  | 3.276048  | 1 |
| C-C  | 2.610394  | -4.556482  | 3.540577  | 1 |
| O-O  | 2.260160  | -3.404348  | 3.791464  | 1 |
| N-NA | 1.634471  | -5.544596  | 3.475886  | 1 |
| H-H  | 0.688618  | -5.258559  | 3.686781  | 1 |
| C-CA | 1.905502  | -6.856997  | 3.170061  | 1 |
| N-N2 | 0.875786  | -7.681364  | 3.100770  | 1 |
| H-H  | -0.069977 | -7.348024  | 3.231261  | 1 |
| H-H  | 1.045544  | -8.631387  | 2.807779  | 1 |
| N-NC | 3.124240  | -7.329108  | 2.894919  | 1 |
| C-CB | 4.091150  | -6.375932  | 2.969609  | 1 |
| C-CT | 7.895643  | -9.065284  | 1.619250  | 1 |
| H-H1 | 8.976441  | -9.078654  | 1.459732  | 1 |
| C-CT | 7.292177  | -7.676204  | 1.447316  | 1 |
| H-HC | 7.961528  | -6.944472  | 1.892076  | 1 |
| H-HC | 7.071640  | -7.427223  | 0.412407  | 1 |
| O-OS | 7.232329  | -10.038555 | 0.826193  | 1 |
| P-P  | 7.367753  | -10.148399 | -0.780999 | 1 |
| O-O2 | 7.857660  | -11.499470 | -1.120955 | 1 |
| O-O2 | 8.026701  | -8.943531  | -1.322533 | 1 |
| O-OS | 5.804722  | -10.063700 | -1.141439 | 1 |
| C-CT | 4.911714  | -11.073907 | -0.695073 | 1 |
| H-H1 | 4.985894  | -11.173324 | 0.389711  | 1 |
| H-H1 | 5.182916  | -12.026963 | -1.152211 | 1 |
| C-CT | 3.460228  | -10.735439 | -1.043939 | 1 |
| H-H1 | 2.828393  | -11.590788 | -0.795116 | 1 |
| O-OS | 3.057174  | -9.604000  | -0.277712 | 1 |
| C-CT | 2.319468  | -8.774559  | -1.143871 | 1 |
| H-H2 | 1.305050  | -9.175455  | -1.271326 | 1 |
| N-N* | 2.269839  | -7.398395  | -0.622545 | 1 |
| C-CK | 3.284240  | -6.487255  | -0.455919 | 1 |
| H-H5 | 4.317125  | -6.714051  | -0.688682 | 1 |
| N-NB | 2.889201  | -5.328279  | -0.000250 | 1 |
| C-CB | 1.511493  | -5.500351  | 0.174393  | 1 |
| C-C  | 0.506949  | -4.607995  | 0.670536  | 1 |
| O-O  | 0.640412  | -3.447202  | 1.046916  | 1 |
| N-NA | -0.765527 | -5.162967  | 0.705205  | 1 |
| H-H  | -1.514680 | -4.607965  | 1.088898  | 1 |
| C-CA | -1.044080 | -6.439239  | 0.290124  | 1 |
| N-N2 | -2.319011 | -6.789889  | 0.313053  | 1 |
| H-H  | -3.021001 | -6.148515  | 0.657265  | 1 |
| H-H  | -2.576045 | -7.708653  | -0.014438 | 1 |
| N-NC | -0.127451 | -7.292147  | -0.179306 | 1 |
| C-CB | 1.129749  | -6.765786  | -0.199920 | 1 |
| C-CT | 3.251994  | -10.390425 | -2.528098 | 1 |
| H-H1 | 4.108969  | -10.686243 | -3.141631 | 1 |
| C-CT | 3.079466  | -8.879857  | -2.454863 | 1 |
| H-HC | 4.056477  | -8.406055  | -2.370585 | 1 |
| H-HC | 2.505764  | -8.483855  | -3.287751 | 1 |
| O-OS | 2.045534  | -10.985765 | -2.978147 | 1 |
| P-P  | 1.711629  | -11.175694 | -4.543330 | 1 |
| O-O2 | 2.048565  | -12.559455 | -4.930058 | 1 |
| O-O2 | 2.256505  | -10.025421 | -5.294019 | 1 |
| O-OS | 0.118063  | -11.015419 | -4.511666 | 1 |

|       |           |            |           |   |     |
|-------|-----------|------------|-----------|---|-----|
| C-CT  | -0.701028 | -11.926134 | -3.790272 | l |     |
| H-H1  | -0.299974 | -12.044293 | -2.782064 | l |     |
| H-H1  | -0.695032 | -12.897550 | -4.285636 | l |     |
| C-CT  | -2.143598 | -11.410592 | -3.659792 | l |     |
| H-H1  | -2.734843 | -12.141978 | -3.106817 | l |     |
| O-OS  | -2.080513 | -10.192583 | -2.929448 | l |     |
| C-CT  | -2.671874 | -9.178983  | -3.710244 | l | H-H |
| H-H2  | -3.726944 | -9.083842  | -3.433444 | l |     |
| N-N*  | -1.928241 | -7.931359  | -3.484522 | h |     |
| C-CK  | -0.584841 | -7.719781  | -3.685460 | h |     |
| H-H5  | 0.062211  | -8.516040  | -4.034232 | h |     |
| N-NB  | -0.224013 | -6.499436  | -3.375529 | h |     |
| C-CB  | -1.384011 | -5.890256  | -2.947846 | h |     |
| C-C   | -1.590160 | -4.556010  | -2.454662 | h |     |
| O-O   | -0.751456 | -3.673528  | -2.317298 | h |     |
| N-NA  | -2.938706 | -4.351275  | -2.102932 | h |     |
| H-H   | -3.200028 | -3.386543  | -1.862480 | h |     |
| C-CA  | -3.912594 | -5.320712  | -2.151818 | h |     |
| N-N2  | -5.115374 | -5.005729  | -1.598784 | h |     |
| H-H   | -5.363930 | -4.019277  | -1.567290 | h |     |
| H-H   | -5.887256 | -5.643462  | -1.805851 | h |     |
| N-NC  | -3.733806 | -6.535859  | -2.631697 | h |     |
| C-CB  | -2.452033 | -6.760917  | -3.005647 | h |     |
| C-CT  | -2.834754 | -11.110582 | -5.004106 | l |     |
| H-H1  | -2.398814 | -11.689421 | -5.824612 | l |     |
| C-CT  | -2.565609 | -9.628924  | -5.163681 | l |     |
| H-HC  | -1.560749 | -9.479552  | -5.553529 | l |     |
| H-HC  | -3.302608 | -9.145195  | -5.799398 | l |     |
| O-OH  | -4.248587 | -11.253902 | -4.941282 | l |     |
| H-HO  | -4.479582 | -12.183285 | -4.834793 | l |     |
| K-K   | -0.216976 | -1.528448  | -0.623147 | l |     |
| K-K   | 0.212662  | -1.812375  | 3.221199  | l |     |
| Cu-Cu | -0.510405 | -1.238805  | -4.739176 | h |     |
| N-NC  | 1.001513  | -0.100829  | -5.432387 | h |     |
| N-NC  | 0.561544  | -2.705838  | -5.665600 | h |     |
| C-CA  | 0.124087  | -3.898182  | -5.921075 | h |     |
| H-HA  | 0.792499  | -4.632587  | -6.379374 | h |     |
| C-CA  | -1.241264 | -4.336686  | -5.762805 | h |     |
| C-CA  | -2.279416 | -3.485362  | -5.251447 | h |     |
| O-OS  | -2.088150 | -2.373164  | -4.646932 | h |     |
| C-CA  | 1.864416  | -2.275167  | -6.039506 | h |     |
| C-CA  | 2.102046  | -0.864708  | -5.891644 | h |     |
| C-CA  | 3.335516  | -0.341101  | -6.197386 | h |     |
| H-HA  | 3.568938  | 0.705459   | -6.010529 | h |     |
| C-CA  | 2.864222  | -3.082230  | -6.539047 | h |     |
| H-HA  | 2.721809  | -4.153985  | -6.646442 | h |     |
| C-CA  | 4.101370  | -2.533551  | -6.966868 | h |     |
| C-CA  | 4.344863  | -1.145347  | -6.773709 | h |     |
| C-CA  | 5.571912  | -0.582746  | -7.216798 | h |     |
| C-CA  | 6.491874  | -1.353980  | -7.881884 | h |     |
| C-CA  | 6.243028  | -2.736950  | -8.095589 | h |     |
| C-CA  | 5.088870  | -3.317139  | -7.625999 | h |     |
| H-HA  | 5.762255  | 0.473874   | -7.035961 | h |     |
| H-HA  | 7.414671  | -0.902012  | -8.230864 | h |     |
| H-HA  | 6.977853  | -3.335410  | -8.623759 | h |     |
| H-HA  | 4.905233  | -4.376825  | -7.780145 | h |     |
| C-CA  | -1.581831 | -5.597521  | -6.294308 | h |     |
| C-CA  | -2.895126 | -6.001955  | -6.448094 | h |     |

|      |           |           |           |   |
|------|-----------|-----------|-----------|---|
| C-CA | -3.935871 | -5.106296 | -6.105239 | h |
| C-CA | -3.627185 | -3.904979 | -5.491538 | h |
| H-HA | -0.782763 | -6.251537 | -6.637706 | h |
| H-HA | -3.121392 | -6.950726 | -6.925820 | h |
| C-CT | -5.314242 | -5.397091 | -6.666187 | h |
| H-HA | -4.374613 | -3.163011 | -5.225695 | h |
| C-CA | 0.977612  | 1.184854  | -5.555330 | h |
| C-CA | -0.124431 | 2.037543  | -5.193624 | h |
| H-HA | 1.835527  | 1.698828  | -5.997982 | h |
| C-CA | -1.370839 | 1.540154  | -4.672707 | h |
| C-CA | -2.398516 | 2.512750  | -4.471388 | h |
| C-CA | -2.204416 | 3.854846  | -4.731003 | h |
| C-CA | -0.955590 | 4.329435  | -5.183770 | h |
| C-CA | 0.053610  | 3.417678  | -5.415457 | h |
| O-OS | -1.617502 | 0.315730  | -4.383519 | h |
| H-HA | -3.347259 | 2.152100  | -4.079777 | h |
| C-CT | -3.326921 | 4.824199  | -4.492797 | h |
| H-HA | -0.797675 | 5.388501  | -5.360957 | h |
| H-HA | 1.020490  | 3.768011  | -5.771215 | h |
| N-N3 | -6.468079 | -5.594895 | -5.696202 | h |
| H-HC | -5.625173 | -4.585812 | -7.326039 | h |
| H-HC | -5.287522 | -6.304466 | -7.269715 | h |
| H-HC | -2.941556 | 5.825620  | -4.282790 | h |
| H-HC | -3.928988 | 4.520945  | -3.633060 | h |
| N-N3 | -4.302963 | 4.986074  | -5.668949 | h |
| C-CT | -6.643616 | -4.390833 | -4.793181 | h |
| C-CT | -7.727798 | -5.798368 | -6.518317 | h |
| C-CT | -6.209058 | -6.791126 | -4.799112 | h |
| C-CT | -8.993669 | -5.973141 | -5.692234 | h |
| H-HC | -7.819579 | -4.927974 | -7.167890 | h |
| H-HC | -7.551572 | -6.669304 | -7.147904 | h |
| H-HC | -7.027320 | -6.793325 | -4.076529 | h |
| C-CT | -6.162703 | -8.141150 | -5.496376 | h |
| H-HC | -5.288877 | -6.576407 | -4.252965 | h |
| H-HC | -7.467560 | -4.642027 | -4.117538 | h |
| H-HC | -5.747540 | -4.325656 | -4.177055 | h |
| C-CT | -6.949746 | -3.092488 | -5.527498 | h |
| H-HC | -6.259377 | -2.880622 | -6.342446 | h |
| H-HC | -7.973992 | -3.084736 | -5.911585 | h |
| H-HC | -6.852463 | -2.280807 | -4.803644 | h |
| H-HC | -8.951663 | -6.823606 | -5.007898 | h |
| H-HC | -9.239921 | -5.090381 | -5.093719 | h |
| H-HC | -9.835104 | -6.133664 | -6.365724 | h |
| H-HC | -7.134765 | -8.428880 | -5.902084 | h |
| H-HC | -5.412216 | -8.204960 | -6.283323 | h |
| H-HC | -5.910319 | -8.888679 | -4.739691 | h |
| C-CT | -3.515420 | 5.334556  | -6.914552 | h |
| C-CT | -5.080360 | 3.703550  | -5.902088 | h |
| C-CT | -5.277022 | 6.092083  | -5.306508 | h |
| H-HC | -6.143705 | 5.988744  | -5.959582 | h |
| H-HC | -5.603965 | 5.875744  | -4.286581 | h |
| C-CT | -4.715873 | 7.505607  | -5.360033 | h |
| H-HC | -3.825353 | 7.612168  | -4.735742 | h |
| H-HC | -4.498957 | 7.859102  | -6.365604 | h |
| H-HC | -5.466575 | 8.161952  | -4.914719 | h |
| C-CT | -4.354810 | 5.616597  | -8.153207 | h |
| H-HC | -2.909727 | 6.200988  | -6.641150 | h |
| H-HC | -2.834608 | 4.499681  | -7.082252 | h |



|      |           |          |           |   |
|------|-----------|----------|-----------|---|
| H-HC | -3.684175 | 6.007847 | -8.919741 | h |
| H-HC | -4.819400 | 4.716319 | -8.554989 | h |
| H-HC | -5.127739 | 6.367854 | -7.979313 | h |
| C-CT | -5.980543 | 3.285099 | -4.747444 | h |
| H-HC | -5.681478 | 3.879594 | -6.793964 | h |
| H-HC | -4.335496 | 2.938613 | -6.123072 | h |
| H-HC | -6.814482 | 3.975203 | -4.600457 | h |
| H-HC | -6.400267 | 2.306026 | -4.984046 | h |
| H-HC | -5.450912 | 3.185595 | -3.797223 | h |

### **3/h-Telo**

|      |           |            |          |   |
|------|-----------|------------|----------|---|
| O-OH | -3.919176 | -6.527523  | 8.886170 | l |
| H-HO | -3.174879 | -6.010384  | 8.539773 | l |
| C-CT | -4.367820 | -7.348924  | 7.814996 | l |
| H-H1 | -4.901211 | -6.762808  | 7.061951 | l |
| H-H1 | -5.048440 | -8.133024  | 8.161462 | l |
| C-CT | -3.141836 | -7.983352  | 7.160160 | l |
| H-H1 | -3.455543 | -8.541816  | 6.275121 | l |
| O-OS | -2.217463 | -6.965338  | 6.795680 | l |
| C-CT | -0.940848 | -7.556135  | 6.790355 | l |
| H-H2 | -0.843107 | -8.223131  | 5.925828 | l |
| N-N* | 0.165524  | -6.569660  | 6.807791 | l |
| C-CK | 1.497576  | -6.827730  | 6.581846 | l |
| H-H5 | 1.886259  | -7.816371  | 6.369699 | l |
| N-NB | 2.266341  | -5.776767  | 6.623587 | l |
| C-CB | 1.386276  | -4.732768  | 6.898837 | l |
| C-CA | 1.559370  | -3.332092  | 7.049111 | l |
| N-N2 | 2.731579  | -2.698940  | 6.927494 | l |
| H-H  | 3.570848  | -3.223620  | 6.727182 | l |
| H-H  | 2.757852  | -1.695305  | 7.032039 | l |
| N-NC | 0.485215  | -2.569985  | 7.327898 | l |
| C-CQ | -0.701427 | -3.159278  | 7.464769 | l |
| H-H5 | -1.531087 | -2.501842  | 7.689507 | l |
| N-NC | -0.996701 | -4.453322  | 7.352507 | l |
| C-CB | 0.101748  | -5.206227  | 7.045759 | l |
| C-CT | -2.384795 | -8.943908  | 8.083267 | l |
| H-H1 | -2.797363 | -8.936073  | 9.099005 | l |
| C-CT | -0.971380 | -8.367470  | 8.075209 | l |
| H-HC | -0.851283 | -7.695265  | 8.924662 | l |
| H-HC | -0.213240 | -9.149435  | 8.084714 | l |
| O-OS | -2.364797 | -10.245138 | 7.520743 | l |
| P-P  | -3.534824 | -11.311127 | 7.846825 | l |
| O-O2 | -3.790560 | -11.281209 | 9.301012 | l |
| O-O2 | -3.203688 | -12.581484 | 7.168742 | l |
| O-OS | -4.801161 | -10.649663 | 7.098148 | l |
| C-CT | -5.059497 | -10.897951 | 5.725170 | l |
| H-H1 | -5.398012 | -11.928419 | 5.604020 | l |
| H-H1 | -4.141666 | -10.757423 | 5.153166 | l |
| C-CT | -6.133291 | -9.929252  | 5.208260 | l |
| H-H1 | -7.019214 | -9.995938  | 5.845476 | l |
| O-OS | -5.569707 | -8.619693  | 5.237870 | l |
| C-CT | -5.393690 | -8.149911  | 3.917388 | l |
| H-H2 | -6.219878 | -7.467347  | 3.662087 | l |
| N-N* | -4.091386 | -7.455074  | 3.866856 | l |
| C-CK | -2.883877 | -7.864589  | 3.350891 | l |
| H-H5 | -2.701304 | -8.839809  | 2.920576 | l |

|      |            |            |           |   |
|------|------------|------------|-----------|---|
| N-NB | -1.944523  | -6.968290  | 3.424924  | 1 |
| C-CB | -2.569031  | -5.869184  | 4.007688  | 1 |
| C-C  | -2.082658  | -4.550454  | 4.279070  | 1 |
| O-O  | -0.965265  | -4.084147  | 4.047729  | 1 |
| N-NA | -3.044483  | -3.720400  | 4.842829  | 1 |
| H-H  | -2.743460  | -2.781503  | 5.060654  | 1 |
| C-CA | -4.328304  | -4.128089  | 5.123092  | 1 |
| N-N2 | -5.143803  | -3.233024  | 5.651991  | 1 |
| H-H  | -4.842206  | -2.281602  | 5.806513  | 1 |
| H-H  | -6.098522  | -3.501579  | 5.835467  | 1 |
| N-NC | -4.804056  | -5.349475  | 4.864402  | 1 |
| C-CB | -3.876192  | -6.169832  | 4.303798  | 1 |
| C-CT | -6.521805  | -10.195840 | 3.744785  | 1 |
| H-H1 | -6.464854  | -11.256665 | 3.489049  | 1 |
| C-CT | -5.455130  | -9.380393  | 3.024369  | 1 |
| H-HC | -4.522437  | -9.939266  | 3.033053  | 1 |
| H-HC | -5.724495  | -9.111512  | 2.004970  | 1 |
| O-OS | -7.834660  | -9.706956  | 3.519015  | 1 |
| P-P  | -8.513861  | -9.649103  | 2.054905  | 1 |
| O-O2 | -9.952619  | -9.953130  | 2.196252  | 1 |
| O-O2 | -7.679523  | -10.401259 | 1.093865  | 1 |
| O-OS | -8.343487  | -8.069860  | 1.772144  | 1 |
| C-CT | -9.289041  | -7.164969  | 2.325707  | 1 |
| H-H1 | -9.316530  | -7.283114  | 3.410638  | 1 |
| H-H1 | -10.276454 | -7.413218  | 1.930196  | 1 |
| C-CT | -9.018594  | -5.692392  | 2.009239  | 1 |
| H-H1 | -9.924636  | -5.126565  | 2.243500  | 1 |
| O-OS | -7.920986  | -5.157791  | 2.735091  | 1 |
| C-CT | -7.585122  | -3.915260  | 2.129088  | 1 |
| H-H2 | -7.919826  | -3.066275  | 2.745105  | 1 |
| N-N* | -6.133310  | -3.833518  | 1.895740  | 1 |
| C-CK | -5.214629  | -4.835858  | 1.714989  | 1 |
| H-H5 | -5.487662  | -5.883333  | 1.737144  | 1 |
| N-NB | -3.990513  | -4.409750  | 1.544180  | 1 |
| C-CB | -4.115614  | -3.019079  | 1.605744  | 1 |
| C-C  | -3.136926  | -1.977165  | 1.510177  | 1 |
| O-O  | -1.917962  | -2.081062  | 1.396685  | 1 |
| N-NA | -3.685848  | -0.701579  | 1.537736  | 1 |
| H-H  | -3.061008  | 0.089466   | 1.491552  | 1 |
| C-CA | -5.031062  | -0.457383  | 1.643560  | 1 |
| N-N2 | -5.390555  | 0.808050   | 1.529570  | 1 |
| H-H  | -4.679241  | 1.512009   | 1.393876  | 1 |
| H-H  | -6.366097  | 1.072121   | 1.505887  | 1 |
| N-NC | -5.958539  | -1.408093  | 1.780936  | 1 |
| C-CB | -5.432608  | -2.663884  | 1.766999  | 1 |
| C-CT | -8.605161  | -5.390749  | 0.579949  | 1 |
| H-H1 | -7.710904  | -5.979722  | 0.358443  | 1 |
| C-CT | -8.272564  | -3.917310  | 0.766352  | 1 |
| H-HC | -7.635884  | -3.544765  | -0.032006 | 1 |
| H-HC | -9.187432  | -3.329773  | 0.813511  | 1 |
| O-OS | -9.596769  | -5.579825  | -0.403663 | 1 |
| P-P  | -9.191858  | -5.545190  | -1.954360 | 1 |
| O-O2 | -10.252403 | -6.177102  | -2.759466 | 1 |
| O-O2 | -7.788728  | -5.988811  | -2.081292 | 1 |
| O-OS | -9.186605  | -3.986974  | -2.285203 | 1 |
| C-CT | -10.339431 | -3.192682  | -2.043674 | 1 |
| H-H1 | -10.649799 | -3.287017  | -1.002745 | 1 |
| H-H1 | -11.166635 | -3.564890  | -2.640555 | 1 |

|      |            |           |           |   |     |
|------|------------|-----------|-----------|---|-----|
| C-CT | -10.110187 | -1.701350 | -2.337160 | 1 |     |
| H-H1 | -11.055310 | -1.175538 | -2.190087 | 1 |     |
| O-OS | -9.126801  | -1.185599 | -1.438414 | 1 |     |
| C-CT | -8.339616  | -0.192790 | -2.071851 | 1 | H-H |
| H-H2 | -8.393341  | 0.771557  | -1.545364 | 1 |     |
| N-N* | -6.959641  | -0.714211 | -2.079410 | h |     |
| C-CK | -6.589882  | -2.029918 | -2.211541 | h |     |
| H-H5 | -7.322111  | -2.817797 | -2.303055 | h |     |
| N-NB | -5.292867  | -2.197741 | -2.182993 | h |     |
| C-CB | -4.788916  | -0.933603 | -2.025389 | h |     |
| C-C  | -3.411559  | -0.548465 | -1.894496 | h |     |
| O-O  | -2.450479  | -1.298868 | -1.886976 | h |     |
| N-NA | -3.308972  | 0.846151  | -1.718033 | h |     |
| H-H  | -2.352981  | 1.225592  | -1.665787 | h |     |
| C-CA | -4.382927  | 1.701330  | -1.671310 | h |     |
| N-N2 | -4.099651  | 3.027031  | -1.556081 | h |     |
| H-H  | -3.143025  | 3.325952  | -1.341086 | h |     |
| H-H  | -4.869856  | 3.610651  | -1.242950 | h |     |
| N-NC | -5.650123  | 1.343753  | -1.787094 | h |     |
| C-CB | -5.793427  | 0.009238  | -1.950339 | h |     |
| C-CT | -9.627555  | -1.371524 | -3.751660 | 1 |     |
| H-H1 | -8.959629  | -2.156563 | -4.092109 | 1 |     |
| C-CT | -8.873341  | -0.072542 | -3.496478 | 1 |     |
| H-HC | -8.084942  | 0.088900  | -4.230750 | 1 |     |
| H-HC | -9.586686  | 0.753016  | -3.530288 | 1 |     |
| O-OS | -10.620589 | -1.071649 | -4.719136 | 1 |     |
| P-P  | -11.798631 | -2.092156 | -5.103330 | 1 |     |
| O-O2 | -11.240630 | -3.460637 | -5.129093 | 1 |     |
| O-O2 | -12.549949 | -1.557512 | -6.254963 | 1 |     |
| O-OS | -12.683564 | -1.905401 | -3.779256 | 1 |     |
| C-CT | -13.651708 | -2.849072 | -3.349617 | 1 |     |
| H-H1 | -13.243824 | -3.860862 | -3.368279 | 1 |     |
| H-H1 | -14.517287 | -2.816181 | -4.013883 | 1 |     |
| C-CT | -14.077858 | -2.510491 | -1.910924 | 1 |     |
| H-H1 | -14.922358 | -3.146400 | -1.631270 | 1 |     |
| O-OS | -13.013149 | -2.687589 | -0.977565 | 1 |     |
| C-CT | -13.420277 | -2.031629 | 0.206998  | 1 |     |
| H-H2 | -14.223585 | -2.613942 | 0.682709  | 1 |     |
| N-N* | -12.292040 | -1.836687 | 1.162753  | 1 |     |
| C-CM | -11.207456 | -1.030714 | 0.872818  | 1 |     |
| H-H4 | -11.138103 | -0.541013 | -0.085110 | 1 |     |
| C-CM | -10.218551 | -0.809082 | 1.776907  | 1 |     |
| C-CT | -9.068756  | 0.116322  | 1.415524  | 1 |     |
| H-HC | -8.335885  | -0.430854 | 0.824380  | 1 |     |
| H-HC | -9.429075  | 0.970129  | 0.839193  | 1 |     |
| H-HC | -8.581466  | 0.476884  | 2.319381  | 1 |     |
| C-C  | -10.256696 | -1.459311 | 3.079366  | 1 |     |
| O-O  | -9.397056  | -1.384093 | 3.950909  | 1 |     |
| N-NA | -11.380361 | -2.221742 | 3.307732  | 1 |     |
| H-H  | -11.469136 | -2.649679 | 4.211518  | 1 |     |
| C-C  | -12.425233 | -2.402390 | 2.430313  | 1 |     |
| O-O  | -13.429973 | -2.995800 | 2.799302  | 1 |     |
| C-CT | -14.490341 | -1.050087 | -1.719670 | 1 |     |
| H-H1 | -13.964204 | -0.418015 | -2.433308 | 1 |     |
| C-CT | -13.997609 | -0.722659 | -0.316938 | 1 |     |
| H-HC | -13.244665 | 0.055283  | -0.365536 | 1 |     |
| H-HC | -14.816276 | -0.384964 | 0.301266  | 1 |     |
| O-OS | -15.890706 | -0.855662 | -1.749125 | 1 |     |

|      |            |           |           |   |
|------|------------|-----------|-----------|---|
| P-P  | -16.635159 | -0.274011 | -3.050712 | 1 |
| O-O2 | -18.072805 | -0.127552 | -2.748195 | 1 |
| O-O2 | -16.185754 | -1.026825 | -4.238722 | 1 |
| O-OS | -15.985739 | 1.194922  | -3.084118 | 1 |
| C-CT | -14.974694 | 1.580344  | -4.012246 | 1 |
| H-H1 | -15.419912 | 1.766085  | -4.991554 | 1 |
| H-H1 | -14.227457 | 0.793263  | -4.126871 | 1 |
| C-CT | -14.283708 | 2.860347  | -3.519419 | 1 |
| H-H1 | -13.394973 | 3.050579  | -4.125781 | 1 |
| O-OS | -15.204763 | 3.936478  | -3.647203 | 1 |
| C-CT | -15.412968 | 4.545194  | -2.382508 | 1 |
| H-H2 | -14.810097 | 5.460047  | -2.302822 | 1 |
| N-N* | -16.856887 | 4.826967  | -2.205210 | 1 |
| C-CM | -17.814802 | 3.974202  | -2.713362 | 1 |
| H-H4 | -17.504187 | 3.121754  | -3.304529 | 1 |
| C-CM | -19.135603 | 4.170294  | -2.472495 | 1 |
| C-CT | -20.141130 | 3.168327  | -3.024880 | 1 |
| H-HC | -20.139994 | 3.202521  | -4.114455 | 1 |
| H-HC | -19.886554 | 2.160576  | -2.689473 | 1 |
| H-HC | -21.144542 | 3.410755  | -2.667753 | 1 |
| C-C  | -19.568423 | 5.313634  | -1.672340 | 1 |
| O-O  | -20.723461 | 5.589506  | -1.371192 | 1 |
| N-NA | -18.549010 | 6.119309  | -1.208949 | 1 |
| H-H  | -18.807358 | 6.919600  | -0.660571 | 1 |
| C-C  | -17.205474 | 5.925381  | -1.428785 | 1 |
| O-O  | -16.377994 | 6.677776  | -0.930358 | 1 |
| C-CT | -13.872092 | 2.767777  | -2.045034 | 1 |
| H-H1 | -13.870978 | 1.734172  | -1.704708 | 1 |
| C-CT | -14.970222 | 3.532589  | -1.336039 | 1 |
| H-HC | -15.780985 | 2.843262  | -1.113749 | 1 |
| H-HC | -14.626604 | 4.008354  | -0.420146 | 1 |
| O-OS | -12.614797 | 3.376046  | -1.825241 | 1 |
| P-P  | -11.399776 | 2.516059  | -1.219795 | 1 |
| O-O2 | -10.155323 | 3.302512  | -1.298769 | 1 |
| O-O2 | -11.464023 | 1.170127  | -1.818892 | 1 |
| O-OS | -11.856907 | 2.399927  | 0.317062  | 1 |
| C-CT | -12.008948 | 3.572787  | 1.110128  | 1 |
| H-H1 | -12.472995 | 4.357494  | 0.511645  | 1 |
| H-H1 | -11.028407 | 3.939320  | 1.423861  | 1 |
| C-CT | -12.902057 | 3.332382  | 2.338614  | 1 |
| H-H1 | -13.064430 | 4.292212  | 2.825175  | 1 |
| O-OS | -14.166870 | 2.800806  | 1.944731  | 1 |
| C-CT | -14.531138 | 1.839304  | 2.915885  | 1 |
| H-H2 | -14.837513 | 2.334526  | 3.847340  | 1 |
| N-N* | -15.606956 | 0.942143  | 2.435118  | 1 |
| C-CK | -15.794560 | -0.399022 | 2.697792  | 1 |
| H-H5 | -15.120220 | -1.003340 | 3.296319  | 1 |
| N-NB | -16.834258 | -0.914765 | 2.102191  | 1 |
| C-CB | -17.430814 | 0.172079  | 1.462712  | 1 |
| C-CA | -18.599850 | 0.322493  | 0.671928  | 1 |
| N-N2 | -19.407251 | -0.684642 | 0.324432  | 1 |
| H-H  | -19.188491 | -1.628066 | 0.608069  | 1 |
| H-H  | -20.204338 | -0.492776 | -0.262377 | 1 |
| N-NC | -18.946896 | 1.554477  | 0.248433  | 1 |
| C-CQ | -18.175742 | 2.588284  | 0.582685  | 1 |
| H-H5 | -18.507001 | 3.559590  | 0.241239  | 1 |
| N-NC | -17.047539 | 2.579599  | 1.290001  | 1 |
| C-CB | -16.715990 | 1.321628  | 1.704015  | 1 |

|      |            |           |          |   |
|------|------------|-----------|----------|---|
| C-CT | -12.300223 | 2.333236  | 3.345192 | 1 |
| H-H1 | -11.251322 | 2.111893  | 3.131116 | 1 |
| C-CT | -13.200147 | 1.129187  | 3.112036 | 1 |
| H-HC | -12.921649 | 0.627713  | 2.190130 | 1 |
| H-HC | -13.206537 | 0.449906  | 3.963731 | 1 |
| O-OS | -12.500440 | 2.653014  | 4.717500 | 1 |
| P-P  | -11.879191 | 3.947648  | 5.454292 | 1 |
| O-O2 | -11.946214 | 3.715957  | 6.911538 | 1 |
| O-O2 | -12.474035 | 5.167730  | 4.874439 | 1 |
| O-OS | -10.341744 | 3.883006  | 5.002840 | 1 |
| C-CT | -9.412524  | 3.015862  | 5.626806 | 1 |
| H-H1 | -9.532043  | 1.989515  | 5.278402 | 1 |
| H-H1 | -9.538879  | 3.032678  | 6.711684 | 1 |
| C-CT | -8.012225  | 3.533852  | 5.318273 | 1 |
| H-H1 | -7.976639  | 4.600383  | 5.555612 | 1 |
| O-OS | -7.053805  | 2.819073  | 6.077929 | 1 |
| C-CT | -5.782106  | 3.074285  | 5.514429 | 1 |
| H-H2 | -5.249380  | 3.863211  | 6.060147 | 1 |
| N-N* | -5.002516  | 1.829778  | 5.507941 | 1 |
| C-CK | -5.466021  | 0.540424  | 5.551237 | 1 |
| H-H5 | -6.517757  | 0.301432  | 5.667502 | 1 |
| N-NB | -4.527122  | -0.356065 | 5.432738 | 1 |
| C-CB | -3.357825  | 0.391917  | 5.305040 | 1 |
| C-C  | -1.997517  | -0.021174 | 5.140455 | 1 |
| O-O  | -1.553551  | -1.162726 | 5.054425 | 1 |
| N-NA | -1.102836  | 1.036958  | 5.064683 | 1 |
| H-H  | -0.120467  | 0.798582  | 5.056643 | 1 |
| C-CA | -1.485136  | 2.355598  | 5.107967 | 1 |
| N-N2 | -0.514783  | 3.250845  | 5.006106 | 1 |
| H-H  | 0.453406   | 2.974397  | 4.904794 | 1 |
| H-H  | -0.758709  | 4.227745  | 5.042467 | 1 |
| N-NC | -2.753976  | 2.766052  | 5.246515 | 1 |
| C-CB | -3.639828  | 1.734911  | 5.350424 | 1 |
| C-CT | -7.548701  | 3.336878  | 3.880102 | 1 |
| H-H1 | -7.786906  | 2.321296  | 3.560726 | 1 |
| C-CT | -6.048365  | 3.489035  | 4.073947 | 1 |
| H-HC | -5.529634  | 2.843974  | 3.373531 | 1 |
| H-HC | -5.745161  | 4.525734  | 3.941467 | 1 |
| O-OS | -8.063030  | 4.302551  | 2.982231 | 1 |
| P-P  | -7.714809  | 4.283777  | 1.409079 | 1 |
| O-O2 | -8.700448  | 5.130995  | 0.709888 | 1 |
| O-O2 | -7.496051  | 2.881600  | 0.995519 | 1 |
| O-OS | -6.294383  | 5.038615  | 1.395569 | 1 |
| C-CT | -6.197194  | 6.400749  | 1.793491 | 1 |
| H-H1 | -6.698377  | 6.537785  | 2.752708 | 1 |
| H-H1 | -6.696920  | 7.030125  | 1.052982 | 1 |
| C-CT | -4.740621  | 6.862346  | 1.941823 | 1 |
| H-H1 | -4.740318  | 7.906201  | 2.265617 | 1 |
| O-OS | -3.995197  | 6.088139  | 2.880745 | 1 |
| C-CT | -2.647638  | 5.970638  | 2.431322 | 1 |
| H-H2 | -1.936248  | 6.267406  | 3.211962 | 1 |
| N-N* | -2.418735  | 4.564046  | 2.022099 | 1 |
| C-CK | -3.348558  | 3.573339  | 1.852933 | 1 |
| H-H5 | -4.406320  | 3.779280  | 1.906230 | 1 |
| N-NB | -2.848905  | 2.386850  | 1.647674 | 1 |
| C-CB | -1.475206  | 2.611588  | 1.628243 | 1 |
| C-C  | -0.387333  | 1.700704  | 1.430203 | 1 |
| O-O  | -0.423286  | 0.474156  | 1.334245 | 1 |

|      |           |           |           |   |     |
|------|-----------|-----------|-----------|---|-----|
| N-NA | 0.839162  | 2.340309  | 1.316117  | 1 |     |
| H-H  | 1.649656  | 1.772452  | 1.121328  | 1 |     |
| C-CA | 0.997880  | 3.696146  | 1.456779  | 1 |     |
| N-N2 | 2.213539  | 4.155453  | 1.239532  | 1 |     |
| H-H  | 2.961418  | 3.542927  | 0.953569  | 1 |     |
| H-H  | 2.368988  | 5.148120  | 1.398481  | 1 |     |
| N-NC | 0.010630  | 4.554061  | 1.743170  | 1 |     |
| C-CB | -1.206839 | 3.951253  | 1.799317  | 1 |     |
| C-CT | -3.951836 | 6.782334  | 0.646511  | 1 |     |
| H-H1 | -4.128951 | 5.806905  | 0.187254  | 1 |     |
| C-CT | -2.550763 | 6.891293  | 1.224894  | 1 |     |
| H-HC | -1.766219 | 6.592993  | 0.536811  | 1 |     |
| H-HC | -2.378654 | 7.911092  | 1.560546  | 1 |     |
| O-OS | -4.251360 | 7.859549  | -0.214048 | 1 |     |
| P-P  | -4.132069 | 7.699790  | -1.801522 | 1 |     |
| O-O2 | -4.803211 | 8.837718  | -2.455744 | 1 |     |
| O-O2 | -4.507572 | 6.314763  | -2.139770 | 1 |     |
| O-OS | -2.564089 | 7.829984  | -2.070731 | 1 |     |
| C-CT | -1.833638 | 8.936408  | -1.561225 | 1 |     |
| H-H1 | -2.055480 | 9.075939  | -0.502236 | 1 |     |
| H-H1 | -2.135522 | 9.850735  | -2.071827 | 1 |     |
| C-CT | -0.318630 | 8.738194  | -1.690012 | 1 |     |
| H-H1 | 0.150199  | 9.541550  | -1.132122 | 1 |     |
| O-OS | 0.074507  | 7.477352  | -1.144001 | 1 |     |
| C-CT | 0.737849  | 6.708711  | -2.135213 | 1 | H-H |
| H-H2 | 1.824435  | 6.727231  | -1.981806 | 1 |     |
| N-N* | 0.196711  | 5.338429  | -2.049618 | h |     |
| C-CK | -1.076278 | 5.000484  | -1.649141 | h |     |
| H-H5 | -1.826043 | 5.755873  | -1.458894 | h |     |
| N-NB | -1.251909 | 3.708371  | -1.554444 | h |     |
| C-CB | -0.044455 | 3.174149  | -1.933850 | h |     |
| C-C  | 0.331747  | 1.793666  | -2.025283 | h |     |
| O-O  | -0.354507 | 0.815857  | -1.756696 | h |     |
| N-NA | 1.648012  | 1.663445  | -2.496229 | h |     |
| H-H  | 1.993491  | 0.715326  | -2.671186 | h |     |
| C-CA | 2.433518  | 2.718210  | -2.903363 | h |     |
| N-N2 | 3.576939  | 2.370662  | -3.547827 | h |     |
| H-H  | 3.933158  | 1.418507  | -3.468087 | h |     |
| H-H  | 4.250233  | 3.108604  | -3.723244 | h |     |
| N-NC | 2.117588  | 3.989237  | -2.762698 | h |     |
| C-CB | 0.870413  | 4.158793  | -2.262431 | h |     |
| C-CT | 0.198456  | 8.812417  | -3.125487 | 1 |     |
| H-H1 | -0.518049 | 9.290819  | -3.796777 | 1 |     |
| C-CT | 0.370554  | 7.344185  | -3.472263 | 1 |     |
| H-HC | -0.585643 | 6.960501  | -3.822403 | 1 |     |
| H-HC | 1.154642  | 7.198381  | -4.215221 | 1 |     |
| O-OS | 1.456299  | 9.462336  | -3.172854 | 1 |     |
| P-P  | 1.575374  | 11.065799 | -3.297575 | 1 |     |
| O-O2 | 0.561921  | 11.524875 | -4.270298 | 1 |     |
| O-O2 | 2.992849  | 11.423917 | -3.488778 | 1 |     |
| O-OS | 1.134559  | 11.584616 | -1.832809 | 1 |     |
| C-CT | -0.053185 | 12.353289 | -1.655276 | 1 |     |
| H-H1 | -0.880960 | 11.879802 | -2.182756 | 1 |     |
| H-H1 | 0.082834  | 13.334952 | -2.104242 | 1 |     |
| C-CT | -0.471182 | 12.496447 | -0.184278 | 1 |     |
| H-H1 | -1.281817 | 13.227121 | -0.119009 | 1 |     |
| O-OS | -0.946299 | 11.223517 | 0.257828  | 1 |     |
| C-CT | -0.687150 | 11.056650 | 1.642291  | 1 |     |

|      |           |           |           |   |
|------|-----------|-----------|-----------|---|
| H-H2 | -1.625510 | 10.920026 | 2.197962  | 1 |
| N-N* | 0.195654  | 9.875059  | 1.840975  | 1 |
| C-CM | 1.332160  | 9.680375  | 1.085539  | 1 |
| H-H4 | 1.576319  | 10.366081 | 0.290962  | 1 |
| C-CM | 2.150664  | 8.619702  | 1.285308  | 1 |
| C-CT | 3.370473  | 8.464089  | 0.393714  | 1 |
| H-HC | 3.075380  | 8.043355  | -0.567614 | 1 |
| H-HC | 3.846012  | 9.426265  | 0.215503  | 1 |
| H-HC | 4.087630  | 7.789540  | 0.857035  | 1 |
| C-C  | 1.854915  | 7.657150  | 2.339759  | 1 |
| O-O  | 2.532676  | 6.681530  | 2.648472  | 1 |
| N-NA | 0.702648  | 7.908066  | 3.046448  | 1 |
| H-H  | 0.479428  | 7.271882  | 3.787437  | 1 |
| C-C  | -0.152295 | 8.964990  | 2.838528  | 1 |
| O-O  | -1.176387 | 9.055890  | 3.504618  | 1 |
| C-CT | 0.611361  | 12.919731 | 0.816915  | 1 |
| H-H1 | 1.556027  | 12.429477 | 0.579477  | 1 |
| C-CT | -0.005339 | 12.345726 | 2.087907  | 1 |
| H-HC | 0.733232  | 12.166488 | 2.865632  | 1 |
| H-HC | -0.762370 | 13.035669 | 2.460152  | 1 |
| O-OS | 0.801800  | 14.308749 | 1.029985  | 1 |
| P-P  | 1.469460  | 15.263816 | -0.080540 | 1 |
| O-O2 | 2.046996  | 16.439204 | 0.600377  | 1 |
| O-O2 | 0.507028  | 15.443963 | -1.184578 | 1 |
| O-OS | 2.691654  | 14.360919 | -0.603886 | 1 |
| C-CT | 3.141310  | 14.424343 | -1.953710 | 1 |
| H-H1 | 3.081383  | 15.454425 | -2.312342 | 1 |
| H-H1 | 2.498460  | 13.809865 | -2.583112 | 1 |
| C-CT | 4.603921  | 13.970807 | -2.100810 | 1 |
| H-H1 | 4.835857  | 13.845798 | -3.162345 | 1 |
| O-OS | 5.403775  | 15.006083 | -1.535926 | 1 |
| C-CT | 6.261152  | 14.427087 | -0.571733 | 1 |
| H-H2 | 7.190284  | 14.088836 | -1.052386 | 1 |
| N-N* | 6.540700  | 15.366166 | 0.529993  | 1 |
| C-CM | 5.621100  | 16.321032 | 0.906172  | 1 |
| H-H4 | 4.690094  | 16.403968 | 0.356293  | 1 |
| C-CM | 5.862097  | 17.150702 | 1.952837  | 1 |
| C-CT | 4.811840  | 18.183424 | 2.340066  | 1 |
| H-HC | 4.883832  | 19.047050 | 1.678903  | 1 |
| H-HC | 3.812475  | 17.751457 | 2.271569  | 1 |
| H-HC | 4.980037  | 18.511086 | 3.367981  | 1 |
| C-C  | 7.108711  | 17.029193 | 2.706646  | 1 |
| O-O  | 7.417785  | 17.674850 | 3.702100  | 1 |
| N-NA | 7.979768  | 16.062855 | 2.249527  | 1 |
| H-H  | 8.850856  | 15.954156 | 2.735193  | 1 |
| C-C  | 7.754374  | 15.217364 | 1.190751  | 1 |
| O-O  | 8.592057  | 14.382628 | 0.865431  | 1 |
| C-CT | 4.968776  | 12.670356 | -1.365189 | 1 |
| H-H1 | 4.100554  | 12.012632 | -1.253822 | 1 |
| C-CT | 5.479521  | 13.236088 | -0.050567 | 1 |
| H-HC | 4.659045  | 13.570914 | 0.576309  | 1 |
| H-HC | 6.112995  | 12.550495 | 0.496291  | 1 |
| O-OS | 6.053948  | 12.040712 | -2.038310 | 1 |
| P-P  | 6.378794  | 10.465604 | -1.891450 | 1 |
| O-O2 | 7.525462  | 10.143584 | -2.765575 | 1 |
| O-O2 | 5.111046  | 9.718981  | -2.015614 | 1 |
| O-OS | 6.872539  | 10.361737 | -0.359538 | 1 |
| C-CT | 8.184430  | 10.742248 | 0.055438  | 1 |

|      |           |           |           |   |
|------|-----------|-----------|-----------|---|
| H-H1 | 8.382076  | 11.784376 | -0.206847 | 1 |
| H-H1 | 8.923205  | 10.113398 | -0.445917 | 1 |
| C-CT | 8.340335  | 10.588465 | 1.579237  | 1 |
| H-H1 | 9.387118  | 10.741455 | 1.855812  | 1 |
| O-OS | 7.520456  | 11.561694 | 2.216481  | 1 |
| C-CT | 6.652574  | 10.927625 | 3.132883  | 1 |
| H-H2 | 7.123334  | 10.894734 | 4.123316  | 1 |
| N-N* | 5.400088  | 11.715498 | 3.159345  | 1 |
| C-CK | 4.155081  | 11.392983 | 2.675443  | 1 |
| H-H5 | 3.907001  | 10.432817 | 2.252692  | 1 |
| N-NB | 3.296521  | 12.368735 | 2.714035  | 1 |
| C-CB | 3.989539  | 13.393746 | 3.353967  | 1 |
| C-CA | 3.638219  | 14.708732 | 3.749414  | 1 |
| N-N2 | 2.466143  | 15.289086 | 3.474324  | 1 |
| H-H  | 1.806524  | 14.835140 | 2.850029  | 1 |
| H-H  | 2.285749  | 16.225474 | 3.799606  | 1 |
| N-NC | 4.539367  | 15.441035 | 4.431639  | 1 |
| C-CQ | 5.739779  | 14.915883 | 4.687055  | 1 |
| H-H5 | 6.430281  | 15.556344 | 5.224856  | 1 |
| N-NC | 6.205211  | 13.714607 | 4.340145  | 1 |
| C-CB | 5.265128  | 12.988246 | 3.669486  | 1 |
| C-CT | 7.874520  | 9.213494  | 2.078788  | 1 |
| H-H1 | 7.860115  | 8.483321  | 1.262901  | 1 |
| C-CT | 6.475739  | 9.513936  | 2.587926  | 1 |
| H-HC | 5.797518  | 9.509325  | 1.740011  | 1 |
| H-HC | 6.153731  | 8.817014  | 3.360564  | 1 |
| O-OS | 8.634408  | 8.749501  | 3.179247  | 1 |
| P-P  | 9.965142  | 7.876550  | 2.952350  | 1 |
| O-O2 | 10.633466 | 7.668822  | 4.252469  | 1 |
| O-O2 | 10.697798 | 8.431873  | 1.795661  | 1 |
| O-OS | 9.257626  | 6.504721  | 2.506748  | 1 |
| C-CT | 8.575614  | 5.686530  | 3.446298  | 1 |
| H-H1 | 8.009102  | 6.295606  | 4.153234  | 1 |
| H-H1 | 9.282581  | 5.073922  | 4.008282  | 1 |
| C-CT | 7.607694  | 4.790345  | 2.680057  | 1 |
| H-H1 | 8.171823  | 4.175581  | 1.968933  | 1 |
| O-OS | 6.856340  | 3.976729  | 3.580711  | 1 |
| C-CT | 5.601397  | 3.835801  | 2.957152  | 1 |
| H-H2 | 5.737733  | 3.254776  | 2.037340  | 1 |
| N-N* | 4.562405  | 3.172741  | 3.762678  | 1 |
| C-CK | 3.359848  | 3.671942  | 4.211454  | 1 |
| H-H5 | 3.114535  | 4.729228  | 4.225178  | 1 |
| N-NB | 2.508089  | 2.754948  | 4.578825  | 1 |
| C-CB | 3.186280  | 1.558358  | 4.347940  | 1 |
| C-C  | 2.748217  | 0.199397  | 4.461009  | 1 |
| O-O  | 1.641643  | -0.218570 | 4.796288  | 1 |
| N-NA | 3.716502  | -0.726465 | 4.091147  | 1 |
| H-H  | 3.461344  | -1.701738 | 4.169085  | 1 |
| C-CA | 4.966313  | -0.377703 | 3.634574  | 1 |
| N-N2 | 5.779386  | -1.368937 | 3.300687  | 1 |
| H-H  | 5.493248  | -2.336408 | 3.369951  | 1 |
| H-H  | 6.698043  | -1.147614 | 2.936462  | 1 |
| N-NC | 5.378277  | 0.886809  | 3.482512  | 1 |
| C-CB | 4.449625  | 1.806764  | 3.868625  | 1 |
| C-CT | 6.571907  | 5.610166  | 1.890071  | 1 |
| H-H1 | 6.796898  | 6.675809  | 1.874643  | 1 |
| C-CT | 5.286642  | 5.277198  | 2.612743  | 1 |
| H-HC | 5.170587  | 5.875418  | 3.515469  | 1 |



|      |           |           |           |   |
|------|-----------|-----------|-----------|---|
| H-HC | 4.431114  | 5.357856  | 1.954522  | 1 |
| O-OS | 6.466154  | 5.061015  | 0.598182  | 1 |
| P-P  | 5.856803  | 5.835403  | -0.658192 | 1 |
| O-O2 | 6.447237  | 7.187135  | -0.695918 | 1 |
| O-O2 | 4.393518  | 5.634688  | -0.662180 | 1 |
| O-OS | 6.507165  | 4.923529  | -1.807170 | 1 |
| C-CT | 7.910982  | 4.696627  | -1.832762 | 1 |
| H-H1 | 8.416534  | 5.349730  | -1.118437 | 1 |
| H-H1 | 8.285692  | 4.927030  | -2.830937 | 1 |
| C-CT | 8.268113  | 3.239364  | -1.500553 | 1 |
| H-H1 | 9.356824  | 3.140240  | -1.547544 | 1 |
| O-OS | 7.820665  | 2.791535  | -0.215534 | 1 |
| C-CT | 7.505866  | 1.409245  | -0.275997 | 1 |
| H-H2 | 8.021930  | 0.836979  | 0.503941  | 1 |
| N-N* | 6.048127  | 1.184479  | -0.140864 | 1 |
| C-CK | 5.027173  | 2.100932  | -0.092163 | 1 |
| H-H5 | 5.199527  | 3.160840  | -0.249749 | 1 |
| N-NB | 3.861451  | 1.582166  | 0.194992  | 1 |
| C-CB | 4.118367  | 0.209197  | 0.283998  | 1 |
| C-C  | 3.247912  | -0.904466 | 0.539768  | 1 |
| O-O  | 2.048335  | -0.901412 | 0.805148  | 1 |
| N-NA | 3.879371  | -2.136670 | 0.438996  | 1 |
| H-H  | 3.329977  | -2.963315 | 0.613608  | 1 |
| C-CA | 5.214689  | -2.282613 | 0.166917  | 1 |
| N-N2 | 5.640092  | -3.531057 | 0.051391  | 1 |
| H-H  | 4.999630  | -4.299101 | 0.193756  | 1 |
| H-H  | 6.610927  | -3.690414 | -0.164585 | 1 |
| N-NC | 6.058694  | -1.260282 | -0.022176 | 1 |
| C-CB | 5.449071  | -0.041925 | 0.044033  | 1 |
| C-CT | 7.666553  | 2.248600  | -2.485349 | 1 |
| H-H1 | 6.595198  | 2.445908  | -2.575935 | 1 |
| C-CT | 7.951743  | 0.997898  | -1.666637 | 1 |
| H-HC | 7.419597  | 0.125078  | -1.995399 | 1 |
| H-HC | 9.014548  | 0.782659  | -1.673860 | 1 |
| O-OS | 8.326581  | 2.262361  | -3.738183 | 1 |
| P-P  | 7.656833  | 1.641559  | -5.068349 | 1 |
| O-O2 | 8.429708  | 2.070635  | -6.248616 | 1 |
| O-O2 | 6.196520  | 1.863207  | -5.005456 | 1 |
| O-OS | 7.885060  | 0.071961  | -4.876971 | 1 |
| C-CT | 9.163183  | -0.447207 | -4.543908 | 1 |
| H-H1 | 9.640987  | 0.185271  | -3.794336 | 1 |
| H-H1 | 9.812880  | -0.441576 | -5.417994 | 1 |
| C-CT | 9.065467  | -1.860936 | -3.952048 | 1 |
| H-H1 | 10.017002 | -2.069516 | -3.471586 | 1 |
| O-OS | 8.010552  | -1.931931 | -2.988952 | 1 |
| C-CT | 7.010065  | -2.833171 | -3.426141 | 1 |
| H-H2 | 7.068409  | -3.760184 | -2.844006 | 1 |
| N-N* | 5.670162  | -2.209085 | -3.307790 | h |
| C-CK | 5.350777  | -0.867586 | -3.295052 | h |
| H-H5 | 6.088459  | -0.106130 | -3.482711 | h |
| N-NB | 4.075472  | -0.641745 | -3.115580 | h |
| C-CB | 3.519171  | -1.900414 | -3.045160 | h |
| C-C  | 2.159156  | -2.291570 | -2.984323 | h |
| O-O  | 1.168101  | -1.531166 | -2.887340 | h |
| N-NA | 2.004817  | -3.664940 | -3.060809 | h |
| H-H  | 1.034136  | -4.009174 | -3.015980 | h |
| C-CA | 3.033284  | -4.548477 | -3.307423 | h |
| N-N2 | 2.677035  | -5.813496 | -3.597365 | h |

H-H

|      |           |           |           |   |
|------|-----------|-----------|-----------|---|
| H-H  | 1.710708  | -6.134134 | -3.477657 | h |
| H-H  | 3.429705  | -6.485056 | -3.664249 | h |
| N-NC | 4.307864  | -4.212960 | -3.319913 | h |
| C-CB | 4.487684  | -2.886912 | -3.195332 | h |
| C-CT | 8.813937  | -2.955703 | -4.987937 | l |
| H-H1 | 9.106680  | -2.651074 | -5.994531 | l |
| C-CT | 7.311730  | -3.123617 | -4.884604 | l |
| H-HC | 6.838730  | -2.361575 | -5.490612 | l |
| H-HC | 6.991650  | -4.122883 | -5.176948 | l |
| O-OS | 9.455418  | -4.159175 | -4.608035 | l |
| P-P  | 10.959078 | -4.498788 | -5.081821 | l |
| O-O2 | 11.026864 | -4.297077 | -6.545025 | l |
| O-O2 | 11.363678 | -5.788653 | -4.489733 | l |
| O-OS | 11.822873 | -3.337032 | -4.369969 | l |
| C-CT | 12.396326 | -2.281109 | -5.135399 | l |
| H-H1 | 11.629675 | -1.808165 | -5.746816 | l |
| H-H1 | 13.136228 | -2.692913 | -5.819980 | l |
| C-CT | 13.039752 | -1.198156 | -4.258305 | l |
| H-H1 | 13.624772 | -0.522793 | -4.887445 | l |
| O-OS | 12.009208 | -0.468357 | -3.598235 | l |
| C-CT | 12.508768 | 0.075639  | -2.385402 | l |
| H-H2 | 12.562433 | 1.171436  | -2.450119 | l |
| N-N* | 11.617201 | -0.327827 | -1.268217 | l |
| C-CM | 11.131806 | -1.613806 | -1.151348 | l |
| H-H4 | 11.413629 | -2.357633 | -1.881431 | l |
| C-CM | 10.267996 | -1.959989 | -0.163702 | l |
| C-CT | 9.714104  | -3.375201 | -0.139138 | l |
| H-HC | 8.814532  | -3.404421 | 0.474786  | l |
| H-HC | 9.457047  | -3.697680 | -1.150131 | l |
| H-HC | 10.458844 | -4.051981 | 0.276875  | l |
| C-C  | 9.868205  | -0.975998 | 0.838708  | l |
| O-O  | 9.078504  | -1.147642 | 1.763026  | l |
| N-NA | 10.439507 | 0.269520  | 0.684935  | l |
| H-H  | 10.217012 | 0.973538  | 1.365218  | l |
| C-C  | 11.270949 | 0.652851  | -0.341493 | l |
| O-O  | 11.631657 | 1.820037  | -0.430485 | l |
| C-CT | 13.939934 | -1.701868 | -3.131808 | l |
| H-H1 | 13.465332 | -2.555569 | -2.650107 | l |
| C-CT | 13.909371 | -0.499944 | -2.202199 | l |
| H-HC | 14.109545 | -0.783409 | -1.169880 | l |
| H-HC | 14.643072 | 0.234283  | -2.534430 | l |
| O-OS | 15.296443 | -1.952950 | -3.455757 | l |
| P-P  | 15.773175 | -3.321864 | -4.156022 | l |
| O-O2 | 17.185012 | -3.553490 | -3.792792 | l |
| O-O2 | 15.350484 | -3.335708 | -5.568698 | l |
| O-OS | 14.873064 | -4.360618 | -3.328907 | l |
| C-CT | 14.956258 | -5.762400 | -3.523105 | l |
| H-H1 | 15.982131 | -6.044022 | -3.773722 | l |
| H-H1 | 14.294435 | -6.061502 | -4.338288 | l |
| C-CT | 14.574005 | -6.494274 | -2.226181 | l |
| H-H1 | 14.550291 | -7.570376 | -2.417133 | l |
| O-OS | 15.587026 | -6.190105 | -1.270785 | l |
| C-CT | 14.975975 | -5.679166 | -0.101745 | l |
| H-H2 | 14.759353 | -6.505476 | 0.585224  | l |
| N-N* | 15.840802 | -4.659687 | 0.527668  | l |
| C-CM | 16.462673 | -3.698361 | -0.238498 | l |
| H-H4 | 16.413622 | -3.775153 | -1.317558 | l |
| C-CM | 17.125621 | -2.662576 | 0.333150  | l |

|      |           |            |           |   |
|------|-----------|------------|-----------|---|
| C-CT | 17.780165 | -1.622762  | -0.566695 | 1 |
| H-HC | 18.687511 | -2.039466  | -1.006182 | 1 |
| H-HC | 17.099268 | -1.328216  | -1.366544 | 1 |
| H-HC | 18.048057 | -0.739770  | 0.017276  | 1 |
| C-C  | 17.202724 | -2.562972  | 1.789671  | 1 |
| O-O  | 17.739838 | -1.663537  | 2.425508  | 1 |
| N-NA | 16.605899 | -3.598990  | 2.478859  | 1 |
| H-H  | 16.678780 | -3.585438  | 3.479409  | 1 |
| C-C  | 15.945975 | -4.665884  | 1.914835  | 1 |
| O-O  | 15.479372 | -5.553835  | 2.619984  | 1 |
| C-CT | 13.228607 | -6.074870  | -1.609165 | 1 |
| H-H1 | 12.548343 | -5.662449  | -2.360291 | 1 |
| C-CT | 13.680832 | -5.041302  | -0.588192 | 1 |
| H-HC | 13.876626 | -4.089664  | -1.071805 | 1 |
| H-HC | 12.971307 | -4.900499  | 0.217380  | 1 |
| O-OS | 12.673528 | -7.200528  | -0.943052 | 1 |
| P-P  | 11.142914 | -7.258756  | -0.431237 | 1 |
| O-O2 | 10.836789 | -8.652675  | -0.055313 | 1 |
| O-O2 | 10.287105 | -6.525193  | -1.385625 | 1 |
| O-OS | 11.203811 | -6.396712  | 0.920533  | 1 |
| C-CT | 11.980530 | -6.816463  | 2.034723  | 1 |
| H-H1 | 12.998855 | -7.050324  | 1.727147  | 1 |
| H-H1 | 11.545104 | -7.717412  | 2.471512  | 1 |
| C-CT | 12.037795 | -5.708682  | 3.092703  | 1 |
| H-H1 | 12.600858 | -6.076439  | 3.955889  | 1 |
| O-OS | 12.669911 | -4.532014  | 2.612754  | 1 |
| C-CT | 12.272595 | -3.505669  | 3.490211  | 1 |
| H-H2 | 12.730767 | -3.634918  | 4.478933  | 1 |
| N-N* | 12.644605 | -2.198963  | 2.916336  | 1 |
| C-CK | 13.458555 | -1.940797  | 1.841426  | 1 |
| H-H5 | 13.896048 | -2.727323  | 1.243376  | 1 |
| N-NB | 13.664290 | -0.673334  | 1.611686  | 1 |
| C-CB | 12.930429 | -0.036593  | 2.615056  | 1 |
| C-CA | 12.692703 | 1.323126   | 2.951595  | 1 |
| N-N2 | 13.184643 | 2.366870   | 2.276525  | 1 |
| H-H  | 13.723623 | 2.213401   | 1.436516  | 1 |
| H-H  | 12.955320 | 3.303137   | 2.572968  | 1 |
| N-NC | 11.898556 | 1.605199   | 4.003909  | 1 |
| C-CQ | 11.369302 | 0.599263   | 4.700784  | 1 |
| H-H5 | 10.741981 | 0.881813   | 5.536877  | 1 |
| N-NC | 11.513757 | -0.710102  | 4.497004  | 1 |
| C-CB | 12.309905 | -0.964230  | 3.418754  | 1 |
| C-CT | 10.646699 | -5.256215  | 3.556412  | 1 |
| H-H1 | 9.880003  | -5.568458  | 2.844495  | 1 |
| C-CT | 10.769377 | -3.731977  | 3.566186  | 1 |
| H-HC | 10.297596 | -3.313393  | 2.681174  | 1 |
| H-HC | 10.342515 | -3.291023  | 4.466489  | 1 |
| O-OS | 10.326332 | -5.697008  | 4.861321  | 1 |
| P-P  | 10.160219 | -7.260304  | 5.224795  | 1 |
| O-O2 | 9.433975  | -7.363160  | 6.506223  | 1 |
| O-O2 | 11.463466 | -7.934244  | 5.056098  | 1 |
| O-OS | 9.194912  | -7.796072  | 4.055437  | 1 |
| C-CT | 8.648293  | -9.104855  | 4.140056  | 1 |
| H-H1 | 8.200112  | -9.241803  | 5.127686  | 1 |
| H-H1 | 9.445332  | -9.839500  | 4.016090  | 1 |
| C-CT | 7.546695  | -9.362742  | 3.105607  | 1 |
| H-H1 | 7.245707  | -10.410039 | 3.181033  | 1 |
| O-OS | 6.441961  | -8.533816  | 3.438779  | 1 |

|      |           |            |           |   |
|------|-----------|------------|-----------|---|
| C-CT | 6.050111  | -7.829733  | 2.282676  | 1 |
| H-H2 | 5.321331  | -8.430658  | 1.719830  | 1 |
| N-N* | 5.453063  | -6.548579  | 2.707642  | 1 |
| C-CK | 6.036565  | -5.323433  | 2.929056  | 1 |
| H-H5 | 7.099355  | -5.140308  | 2.845667  | 1 |
| N-NB | 5.192348  | -4.384109  | 3.254986  | 1 |
| C-CB | 3.960377  | -5.038795  | 3.281064  | 1 |
| C-C  | 2.641202  | -4.549371  | 3.549375  | 1 |
| O-O  | 2.291550  | -3.396844  | 3.798573  | 1 |
| N-NA | 1.665300  | -5.537887  | 3.489373  | 1 |
| H-H  | 0.719684  | -5.251804  | 3.700766  | 1 |
| C-CA | 1.936415  | -6.851378  | 3.188441  | 1 |
| N-N2 | 0.906937  | -7.676253  | 3.121523  | 1 |
| H-H  | -0.039076 | -7.343326  | 3.250864  | 1 |
| H-H  | 1.077426  | -8.627363  | 2.832310  | 1 |
| N-NC | 3.154912  | -7.324034  | 2.913671  | 1 |
| C-CB | 4.121162  | -6.369583  | 2.980516  | 1 |
| C-CT | 7.919523  | -9.070999  | 1.643924  | 1 |
| H-H1 | 9.000566  | -9.091052  | 1.486947  | 1 |
| C-CT | 7.322687  | -7.680259  | 1.462604  | 1 |
| H-HC | 7.992539  | -6.948685  | 1.906601  | 1 |
| H-HC | 7.107786  | -7.435382  | 0.425526  | 1 |
| O-OS | 7.252743  | -10.045113 | 0.854647  | 1 |
| P-P  | 7.396130  | -10.168255 | -0.750793 | 1 |
| O-O2 | 7.892362  | -11.520554 | -1.076447 | 1 |
| O-O2 | 8.054435  | -8.966096  | -1.299239 | 1 |
| O-OS | 5.834536  | -10.091653 | -1.120113 | 1 |
| C-CT | 4.943032  | -11.104203 | -0.675443 | 1 |
| H-H1 | 5.010133  | -11.198459 | 0.410287  | 1 |
| H-H1 | 5.222223  | -12.057840 | -1.126504 | 1 |
| C-CT | 3.491996  | -10.775313 | -1.036227 | 1 |
| H-H1 | 2.863895  | -11.635726 | -0.795578 | 1 |
| O-OS | 3.074510  | -9.649037  | -0.270027 | 1 |
| C-CT | 2.339205  | -8.820280  | -1.139055 | 1 |
| H-H2 | 1.327254  | -9.224454  | -1.275083 | 1 |
| N-N* | 2.282005  | -7.445350  | -0.614109 | 1 |
| C-CK | 3.294652  | -6.535573  | -0.429230 | 1 |
| H-H5 | 4.330231  | -6.762317  | -0.649374 | 1 |
| N-NB | 2.894922  | -5.378405  | 0.027273  | 1 |
| C-CB | 1.514723  | -5.550029  | 0.181647  | 1 |
| C-C  | 0.504765  | -4.659886  | 0.671075  | 1 |
| O-O  | 0.635342  | -3.503857  | 1.063170  | 1 |
| N-NA | -0.769852 | -5.210845  | 0.677568  | 1 |
| H-H  | -1.523804 | -4.659917  | 1.057807  | 1 |
| C-CA | -1.044267 | -6.484042  | 0.250617  | 1 |
| N-N2 | -2.319931 | -6.832883  | 0.255492  | 1 |
| H-H  | -3.024971 | -6.190454  | 0.590840  | 1 |
| H-H  | -2.574528 | -7.748535  | -0.082680 | 1 |
| N-NC | -0.121999 | -7.336315  | -0.208938 | 1 |
| C-CB | 1.136421  | -6.812335  | -0.207021 | 1 |
| C-CT | 3.295221  | -10.427640 | -2.521296 | 1 |
| H-H1 | 4.161591  | -10.712881 | -3.126559 | 1 |
| C-CT | 3.109028  | -8.919087  | -2.444645 | 1 |
| H-HC | 4.081315  | -8.437108  | -2.353040 | 1 |
| H-HC | 2.537679  | -8.526582  | -3.280574 | 1 |
| O-OS | 2.099838  | -11.032083 | -2.988954 | 1 |
| P-P  | 1.783427  | -11.208876 | -4.559954 | 1 |
| O-O2 | 2.103995  | -12.595848 | -4.949263 | 1 |

|       |           |            |           |   |     |
|-------|-----------|------------|-----------|---|-----|
| O-O2  | 2.356586  | -10.064088 | -5.297988 | l |     |
| O-OS  | 0.191997  | -11.024476 | -4.551368 | l |     |
| C-CT  | -0.650970 | -11.931860 | -3.853713 | l |     |
| H-H1  | -0.273576 | -12.057777 | -2.837349 | l |     |
| H-H1  | -0.641005 | -12.900949 | -4.353507 | l |     |
| C-CT  | -2.092609 | -11.407257 | -3.753743 | l |     |
| H-H1  | -2.700622 | -12.136397 | -3.216137 | l |     |
| O-OS  | -2.037071 | -10.192637 | -3.017891 | l |     |
| C-CT  | -2.603774 | -9.172799  | -3.808350 | l | H-H |
| H-H2  | -3.663867 | -9.071663  | -3.554098 | l |     |
| N-N*  | -1.857808 | -7.930948  | -3.559893 | h |     |
| C-CK  | -0.512281 | -7.720143  | -3.743607 | h |     |
| H-H5  | 0.136800  | -8.514339  | -4.093300 | h |     |
| N-NB  | -0.151671 | -6.503919  | -3.417067 | h |     |
| C-CB  | -1.315505 | -5.896600  | -2.995433 | h |     |
| C-C   | -1.533454 | -4.563132  | -2.512970 | h |     |
| O-O   | -0.695783 | -3.672338  | -2.379981 | h |     |
| N-NA  | -2.880154 | -4.358906  | -2.175035 | h |     |
| H-H   | -3.153040 | -3.390139  | -1.966407 | h |     |
| C-CA  | -3.853228 | -5.330626  | -2.231383 | h |     |
| N-N2  | -5.056316 | -5.020976  | -1.677863 | h |     |
| H-H   | -5.300219 | -4.035160  | -1.624394 | h |     |
| H-H   | -5.830569 | -5.654658  | -1.888123 | h |     |
| N-NC  | -3.669333 | -6.543172  | -2.713545 | h |     |
| C-CB  | -2.384949 | -6.765429  | -3.075377 | h |     |
| C-CT  | -2.753031 | -11.098006 | -5.111534 | l |     |
| H-H1  | -2.303661 | -11.677188 | -5.924510 | l |     |
| C-CT  | -2.470706 | -9.617694  | -5.261010 | l |     |
| H-HC  | -1.457019 | -9.474194  | -5.629627 | l |     |
| H-HC  | -3.191865 | -9.126211  | -5.909447 | l |     |
| O-OH  | -4.168896 | -11.232614 | -5.078603 | l |     |
| H-HO  | -4.407497 | -12.161165 | -4.982431 | l |     |
| K-K   | -0.172742 | -1.554171  | -0.579780 | l |     |
| K-K   | 0.236679  | -1.822043  | 3.221907  | l |     |
| Zn-Zn | -0.440292 | -1.365079  | -4.258508 | h |     |
| N-NC  | 1.025689  | -0.186710  | -5.363305 | h |     |
| N-NC  | 0.598016  | -2.802629  | -5.584693 | h |     |
| C-CA  | 0.117864  | -3.921960  | -6.014872 | h |     |
| H-HA  | 0.727174  | -4.563986  | -6.660626 | h |     |
| C-CA  | -1.245089 | -4.374271  | -5.839018 | h |     |
| C-CA  | -2.272873 | -3.537772  | -5.280834 | h |     |
| O-OS  | -2.070263 | -2.462448  | -4.621864 | h |     |
| C-CA  | 1.882507  | -2.359633  | -5.991705 | h |     |
| C-CA  | 2.110667  | -0.945050  | -5.857085 | h |     |
| C-CA  | 3.338587  | -0.418640  | -6.185573 | h |     |
| H-HA  | 3.566091  | 0.631084   | -6.006413 | h |     |
| C-CA  | 2.889066  | -3.165235  | -6.482288 | h |     |
| H-HA  | 2.756651  | -4.242310  | -6.550521 | h |     |
| C-CA  | 4.115559  | -2.612670  | -6.937544 | h |     |
| C-CA  | 4.346947  | -1.219083  | -6.769596 | h |     |
| C-CA  | 5.563104  | -0.651043  | -7.236260 | h |     |
| C-CA  | 6.482654  | -1.422862  | -7.901900 | h |     |
| C-CA  | 6.245787  | -2.811542  | -8.089858 | h |     |
| C-CA  | 5.103866  | -3.396117  | -7.595455 | h |     |
| H-HA  | 5.744827  | 0.410352   | -7.073286 | h |     |
| H-HA  | 7.395771  | -0.967353  | -8.271155 | h |     |
| H-HA  | 6.979532  | -3.410791  | -8.618741 | h |     |
| H-HA  | 4.929080  | -4.459869  | -7.731718 | h |     |

|      |           |           |           |   |
|------|-----------|-----------|-----------|---|
| C-CA | -1.597431 | -5.603035 | -6.428470 | h |
| C-CA | -2.914512 | -6.000675 | -6.581694 | h |
| C-CA | -3.944283 | -5.110058 | -6.202072 | h |
| C-CA | -3.623967 | -3.929345 | -5.553405 | h |
| H-HA | -0.804783 | -6.240486 | -6.815853 | h |
| H-HA | -3.150412 | -6.928755 | -7.094381 | h |
| C-CT | -5.328285 | -5.381083 | -6.752616 | h |
| H-HA | -4.363935 | -3.187116 | -5.268215 | h |
| C-CA | 0.980829  | 1.083570  | -5.580676 | h |
| C-CA | -0.093621 | 1.962880  | -5.188275 | h |
| H-HA | 1.786462  | 1.569765  | -6.141964 | h |
| C-CA | -1.331512 | 1.492050  | -4.621377 | h |
| C-CA | -2.350240 | 2.481080  | -4.450123 | h |
| C-CA | -2.140506 | 3.817203  | -4.732474 | h |
| C-CA | -0.891154 | 4.268259  | -5.203869 | h |
| C-CA | 0.096897  | 3.333104  | -5.444649 | h |
| O-OS | -1.572778 | 0.283464  | -4.278363 | h |
| H-HA | -3.304173 | 2.142164  | -4.052003 | h |
| C-CT | -3.251677 | 4.800170  | -4.502498 | h |
| H-HA | -0.717935 | 5.322072  | -5.398269 | h |
| H-HA | 1.058602  | 3.661016  | -5.835109 | h |
| N-N3 | -6.467842 | -5.585907 | -5.767161 | h |
| H-HC | -5.644450 | -4.558960 | -7.396268 | h |
| H-HC | -5.316984 | -6.280735 | -7.368176 | h |
| H-HC | -2.859641 | 5.800450  | -4.301506 | h |
| H-HC | -3.855534 | 4.507953  | -3.640973 | h |
| N-N3 | -4.230331 | 4.956764  | -5.677595 | h |
| C-CT | -6.635327 | -4.387518 | -4.855442 | h |
| C-CT | -7.735649 | -5.788818 | -6.576049 | h |
| C-CT | -6.192431 | -6.782272 | -4.875312 | h |
| C-CT | -8.992422 | -5.975511 | -5.740247 | h |
| H-HC | -7.837645 | -4.912465 | -7.216334 | h |
| H-HC | -7.562097 | -6.653097 | -7.215367 | h |
| H-HC | -7.013972 | -6.801870 | -4.156218 | h |
| C-CT | -6.113073 | -8.127198 | -5.578683 | h |
| H-HC | -5.277298 | -6.554451 | -4.325719 | h |
| H-HC | -7.458248 | -4.639507 | -4.179368 | h |
| H-HC | -5.736979 | -4.332760 | -4.242268 | h |
| C-CT | -6.934809 | -3.079647 | -5.574846 | h |
| H-HC | -6.250130 | -2.866680 | -6.394031 | h |
| H-HC | -7.963402 | -3.056165 | -5.947117 | h |
| H-HC | -6.818327 | -2.276592 | -4.843878 | h |
| H-HC | -8.943860 | -6.835553 | -5.068774 | h |
| H-HC | -9.230582 | -5.100205 | -5.127892 | h |
| H-HC | -9.840676 | -6.124997 | -6.407521 | h |
| H-HC | -7.068807 | -8.422770 | -6.016218 | h |
| H-HC | -5.335866 | -8.176680 | -6.340212 | h |
| H-HC | -5.876351 | -8.876149 | -4.818390 | h |
| C-CT | -3.443039 | 5.266423  | -6.933648 | h |
| C-CT | -5.028029 | 3.681341  | -5.879981 | h |
| C-CT | -5.184996 | 6.084208  | -5.334712 | h |
| H-HC | -6.049900 | 5.988258  | -5.991354 | h |
| H-HC | -5.522643 | 5.886646  | -4.314663 | h |
| C-CT | -4.598331 | 7.486645  | -5.401441 | h |
| H-HC | -3.724467 | 7.590815  | -4.753804 | h |
| H-HC | -4.347459 | 7.815087  | -6.407598 | h |
| H-HC | -5.350819 | 8.163759  | -4.991901 | h |
| C-CT | -4.284276 | 5.549724  | -8.170533 | h |

|      |           |          |           |   |
|------|-----------|----------|-----------|---|
| H-HC | -2.814578 | 6.121729 | -6.677468 | h |
| H-HC | -2.783840 | 4.412668 | -7.092169 | h |
| H-HC | -3.607788 | 5.898259 | -8.952392 | h |
| H-HC | -4.784933 | 4.657672 | -8.546865 | h |
| H-HC | -5.028112 | 6.332055 | -8.007522 | h |
| C-CT | -5.925330 | 3.297385 | -4.710825 | h |
| H-HC | -5.634109 | 3.848163 | -6.770276 | h |
| H-HC | -4.295713 | 2.901603 | -6.090861 | h |
| H-HC | -6.745678 | 4.004148 | -4.566323 | h |
| H-HC | -6.364299 | 2.322447 | -4.928545 | h |
| H-HC | -5.389009 | 3.201848 | -3.763643 | h |
